# Supplementary material
Source: PubMed Central journal article supplement (PMC3400452)
Supplement: supp_mcs124_mcs124suppl.pdf [file supp_mcs124_mcs124suppl.pdf]

## SUPPLEMENTARY DATA

TABLE S1. ANCOVA results for the fixed effect model of presence of self-sterility, proportional sample size (number of species in which breeding system has been assessed/total number of species in a family) and their interaction on the species richness of 164 and 66 families designated as self-sterile and self-compatible, respectively.

| Source                                 | d.f. | Sum of squares | Mean square | <i>F</i> Ratio | Prob > <i>F</i> |
|----------------------------------------|------|----------------|-------------|----------------|-----------------|
| SS presence                            | 1    | 42629154       | 42629154    | 6.02           | 0.0149          |
| Proportional sample size               | 1    | 24801652       | 24801652    | 3.50           | 0.0627          |
| SS presence × Proportional sample size | 1    | 10610112       | 10610112    | 1.50           | 0.2224          |

FIG. 1. Mean and standard error of Kendall–Moran estimator of DR ( $\hat{r}_{KM}$ ) using the estimates of (a) Wikström *et al.* (2001), (b) Davies *et al.* (2004) and (c) exponential and (d) lognormal Bell *et al.* (2010) calibrations for the divergence age of the families bearing homomorphic SI: 16 with stigmatic SI, 14 with stylar SI, 16 with ovarian SI and 5 with post-fertilization SI; 17 with heteromorphy and 5 with heteromorphy + SI, 22 with polymorphic basis to SI, 74 families bearing SS unclassified species and for 66 families bearing SC. Means with different letters were found to be significantly different (Tukey HSD test,  $P < 0.05$ ).

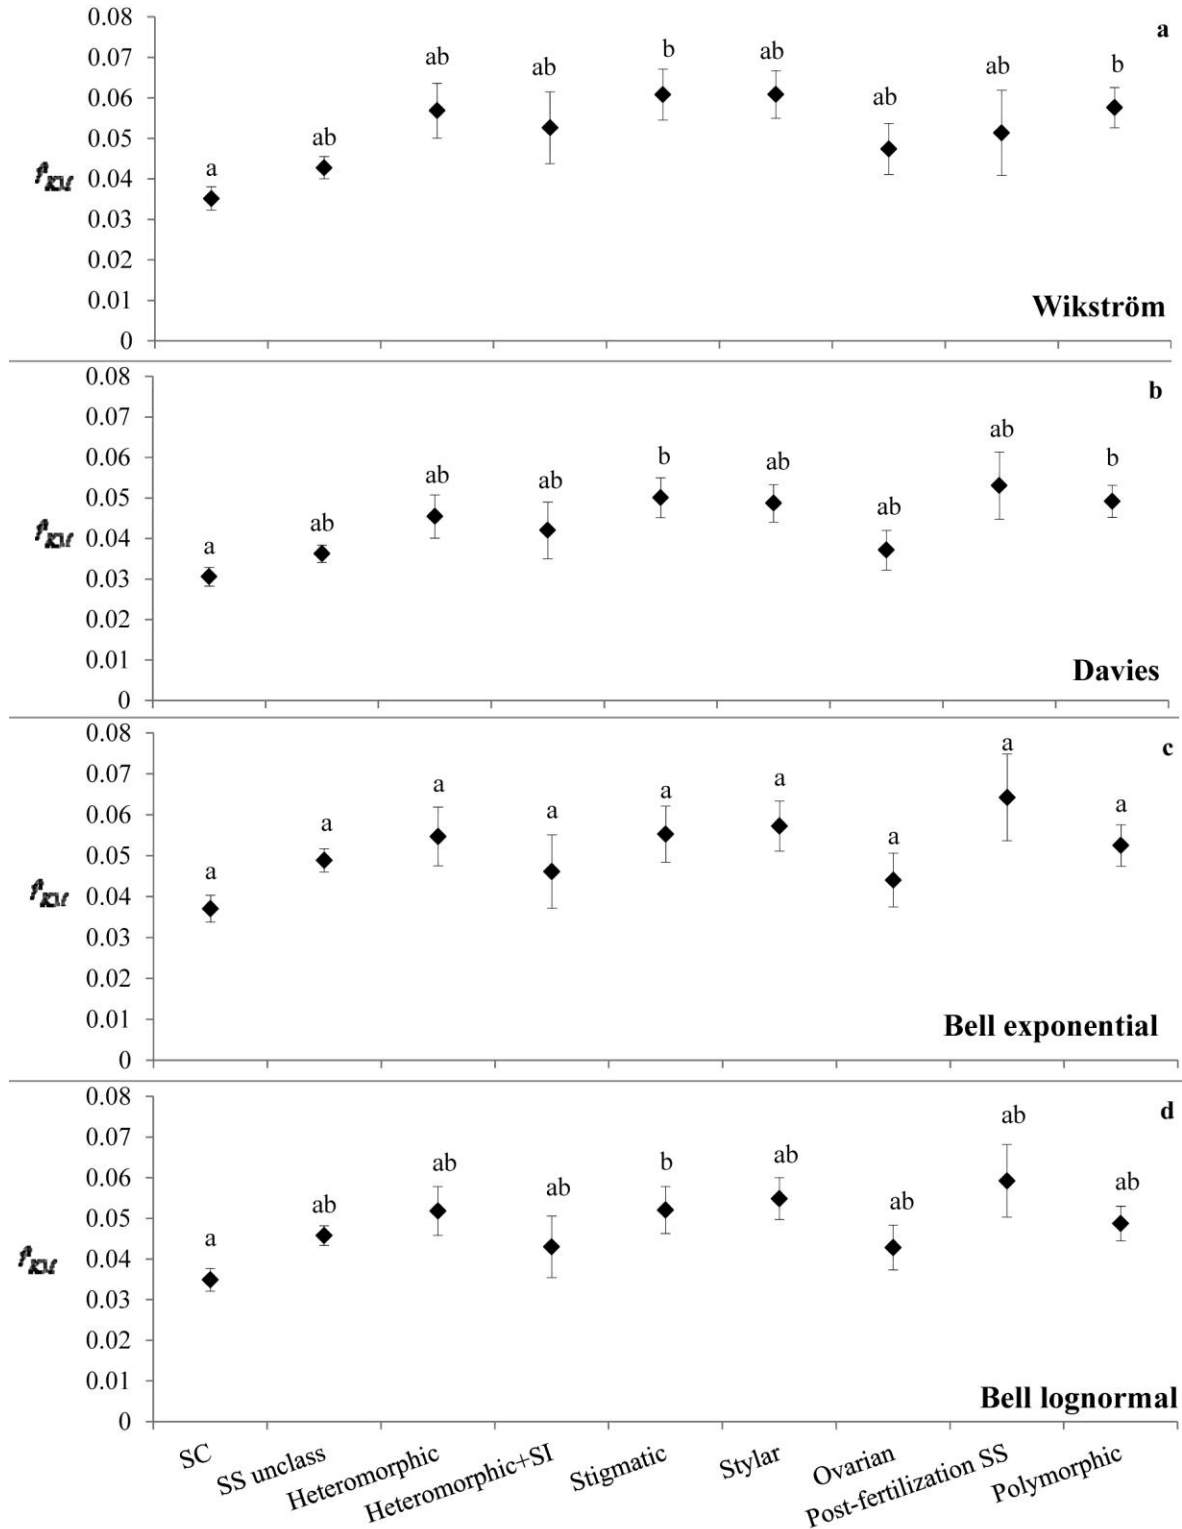

FIG. S2. Proportion of the total number of species in the sister-group pair bearing SC (black bars) versus (a) the total number of species in the sister clade with homomorphic SI clades (grey bars); or (b) the expected proportion of taxa with SS in the clade with homomorphic SI (grey bars) for each one of the ten sister-group comparisons inferred from the Soltis *et al.* (2011) topology (those for other comparisons performed are presented elsewhere in these Supplementary Data).

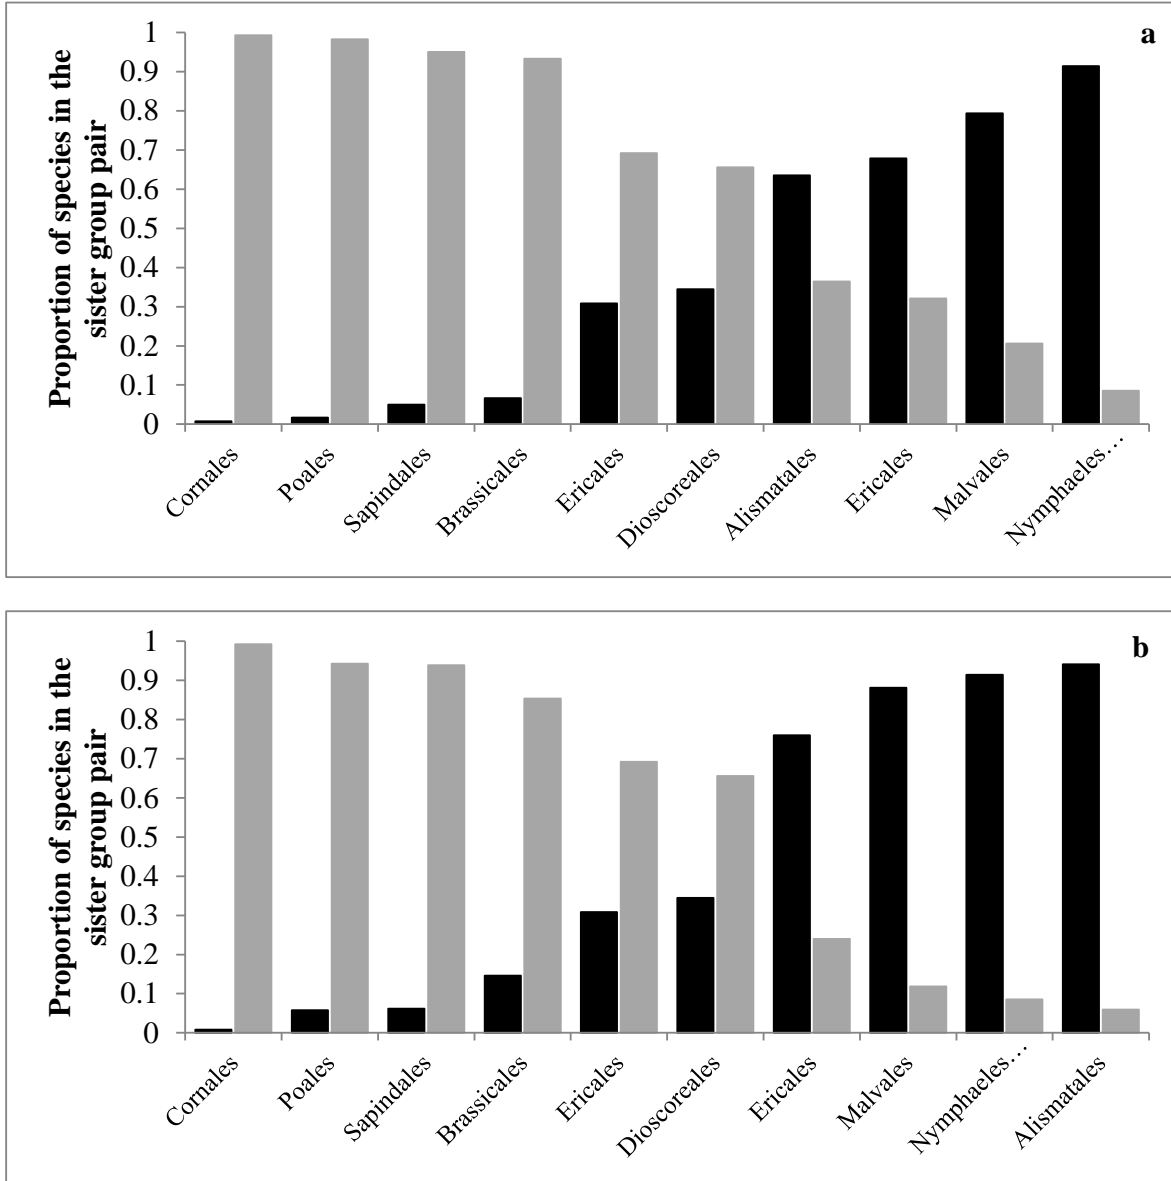

FIG. S3. Proportion of the total number of species in the sister-group pair bearing SC (black bars) versus (a) the total number of species in the sister clade with polymorphic SI clades (grey bars); or (b) the expected proportion of taxa with SS in the clade with polymorphic SI (grey bars) for each one of the eight sister-group comparisons inferred from the Soltis *et al.* (2011) topology (those for other comparisons performed are presented elsewhere in these Supplementary Data).

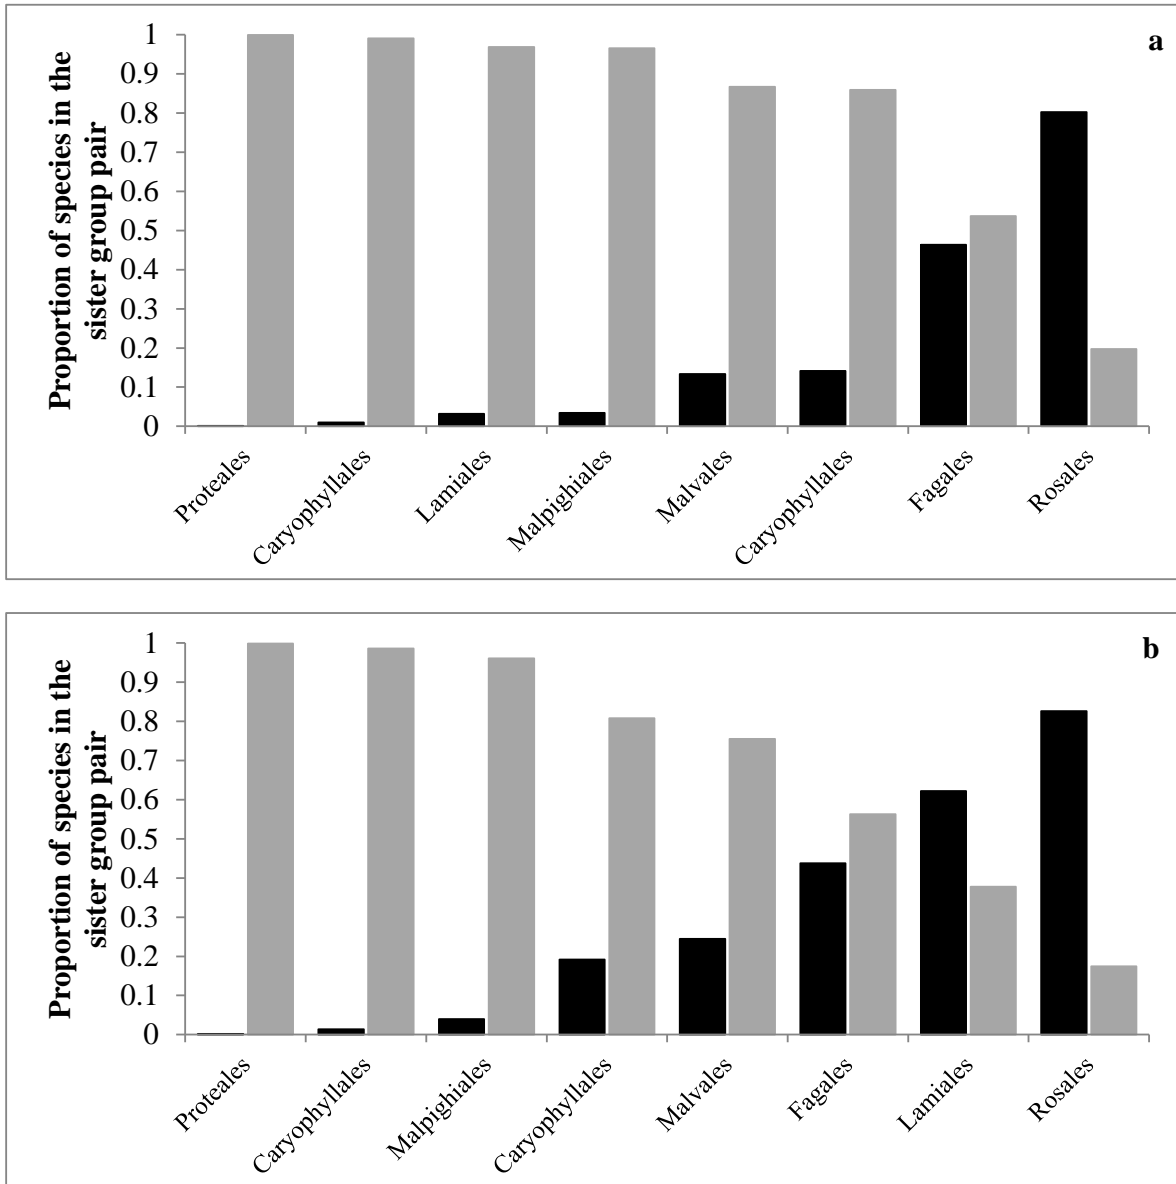

FIG. S4. Proportion of the total number of species in the sister-group pair bearing SC (black bars) versus (a) the total number of species in the sister clade with unclassified SS clades (grey bars); or (b) the expected proportion of taxa with SS in the clade with unclassified SS (grey bars) for each one of the 18 sister-group comparisons inferred from the Soltis *et al.* (2011) topology (those for other comparisons performed are presented elsewhere in these Supplementary Data).

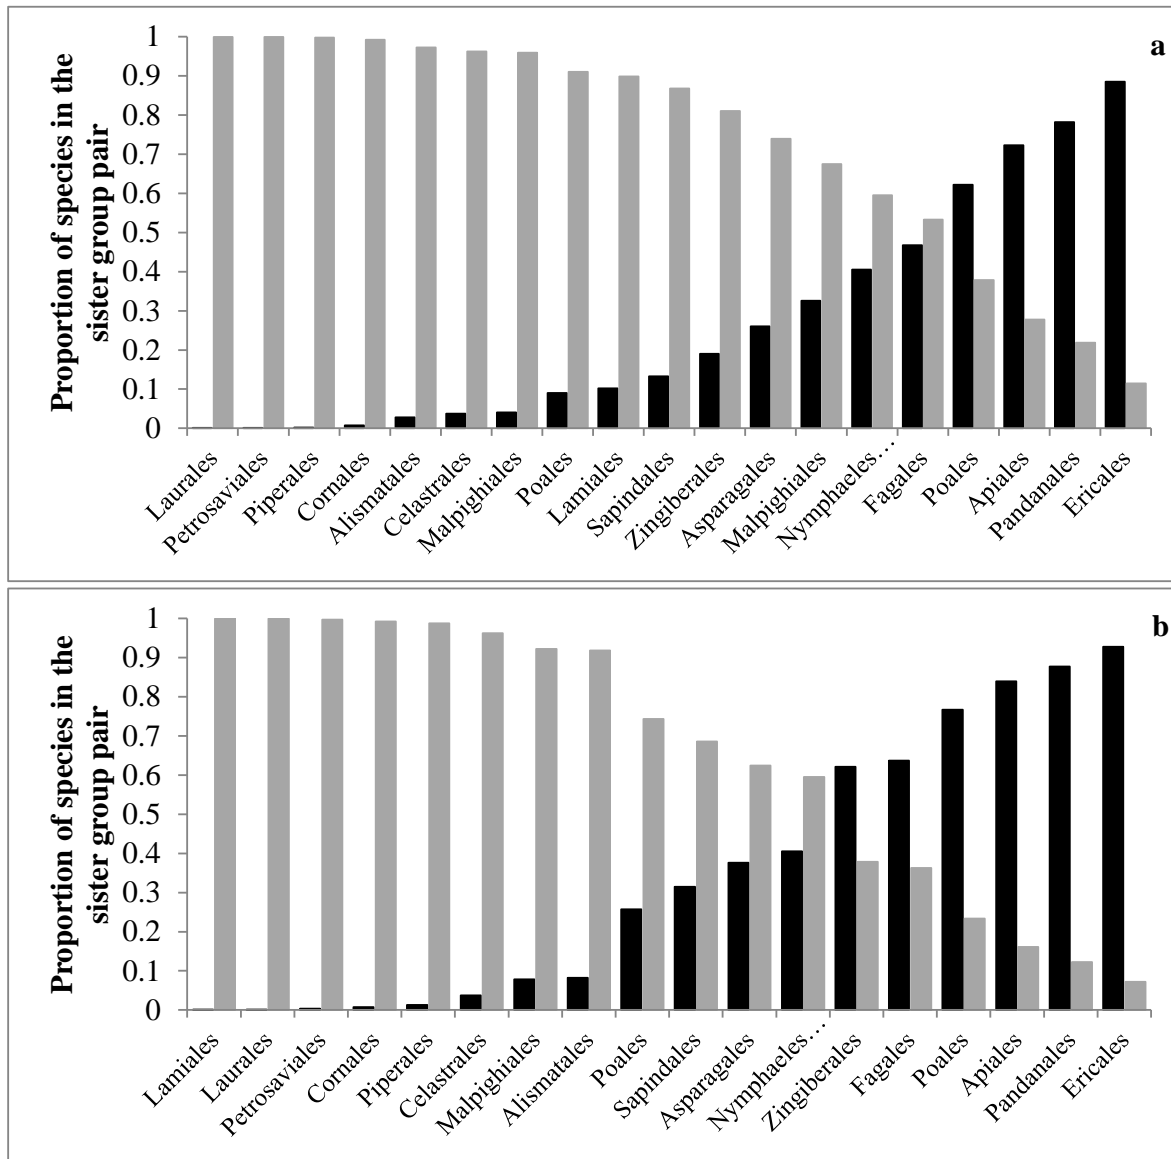

APPENDIX S1

Studies in which microscopic and genetic analysis has been conducted to elucidate the inhibition site and the genetic control of the pre-zygotic self-incompatibility system by family according angiosperm phylogeny group classification.

| ANITA                  |                                                                                                                          |                                            |           |
|------------------------|--------------------------------------------------------------------------------------------------------------------------|--------------------------------------------|-----------|
| Family                 | Species                                                                                                                  | SI inhibition                              | Reference |
| Trimeniaceae           | <i>Trimenia moorei</i>                                                                                                   | Stigmatic                                  | [1]       |
| Magnoliids             |                                                                                                                          |                                            |           |
| Family                 | Species                                                                                                                  | SI inhibition                              | Reference |
| Annonaceae             | <i>Uvaria elmerii</i>                                                                                                    | Ovarian                                    | [2]       |
| Saururaceae            | <i>Saururus cernuus</i>                                                                                                  | Stigmatic                                  | [3]       |
| Winteraceae            | <i>Pseudowintera axillaris</i>                                                                                           | Ovarian                                    | [4]       |
| Monocots + Commelinids |                                                                                                                          |                                            |           |
| Family                 | Species                                                                                                                  | SI inhibition                              | Reference |
| Alismataceae           | <i>Baldellia ranunculoides</i> subsp. <i>repens</i>                                                                      | Stigmatic                                  | [5]       |
| Amaryllidaceae         | <i>Narcissus triandrus</i>                                                                                               | Ovarian                                    | [6]       |
| Amaryllidaceae         | <i>Narcissus tazetta</i>                                                                                                 | Ovarian                                    | [7]       |
| Bromeliaceae           | <i>Ananas comosus</i> , <i>Gasteria</i> spp. ( <i>G. verrucosa</i> X <i>G. picta</i> )                                   | Stylar, gametophytic control, one locus    | [8]       |
| Butomaceae             | <i>Butomus umbellatus</i>                                                                                                | Stylar                                     | [9]       |
| Commelinaceae          | <i>Tradescantia paludosa</i>                                                                                             | Stigmatic, gametophytic control, one locus | [10]      |
| Commelinaceae          | <i>Dichorisandra</i> sp., <i>Siderasis fuscata</i>                                                                       | Stylar                                     | [11]      |
| Hemerocallidaceae      | <i>Hemerocallis cetrina</i> , <i>H. flava</i> , <i>H. fulva</i> , <i>H. thunbergii</i>                                   | Ovarian                                    | [12]      |
| Hyacinthaceae          | <i>Albuca angolensis</i> , <i>A. bainesii</i> , <i>A. fibrotunicata</i> , <i>A. scabromarginata</i> , <i>A. sudanica</i> | Ovarian                                    | [13]      |
| Iridaceae              | <i>Crocus thomasi</i> , <i>C. vernus</i> subsp. <i>vernus</i>                                                            | Ovarian                                    | [14-17]   |
| Liliaceae              | <i>Lilium martagon</i>                                                                                                   | Stigmatic, gametophytic control, four loci | [18]      |
| Liliaceae              | <i>Lilium longifolium</i>                                                                                                | Stylar                                     | [19]      |

|                                 |                                                                                                                                                                                                                               |                                                            |                                      |
|---------------------------------|-------------------------------------------------------------------------------------------------------------------------------------------------------------------------------------------------------------------------------|------------------------------------------------------------|--------------------------------------|
| Liliaceae                       | <i>Lilium candidum</i> , <i>L. pardalinum</i> , <i>L. szovitsianum</i> ,                                                                                                                                                      | Ovarian                                                    | [20]                                 |
| Melanthiaceae                   | <i>Trillium grandiflorum</i><br><i>Trillium erectum</i>                                                                                                                                                                       | Stigmatic                                                  | [21]                                 |
| Orchidaceae                     | <i>Octomeria crassifolia</i> , <i>O. grandiflora</i> , <i>O. praestans</i><br><i>Pleurothallis</i>                                                                                                                            | Stigmatic                                                  | [22]<br>[23]                         |
| Orchidaceae                     | <i>Pleurothallis johannensis</i> , <i>P. teres</i> , <i>P. ochreatea</i> , <i>P. fabriobarrosii</i>                                                                                                                           | Stylar                                                     | [23]                                 |
| Orchidaceae                     | <i>Dendrobium</i> spp. <i>Pleurothallis adamantinensis</i> , <i>P. fabriobarrosii</i>                                                                                                                                         | Ovarian                                                    | [24]<br>[25]                         |
| Poaceae                         | <i>Secale cereale</i><br><br><i>Phalaris coerulescens</i><br><br><i>Lolium multiflorum</i><br><br><br><br><i>Festuca pratensis</i>                                                                                            | Stigmatic, gametophytic control,<br>two loci               | [26]<br>[27]<br>[28]<br>[29]<br>[30] |
| Poaceae                         | <i>Lolium perenne</i>                                                                                                                                                                                                         | Stigmatic, gametophytic control,<br>three loci             | [31]                                 |
| Strelitziaceae                  | <i>Phenakospermum guayanensis</i>                                                                                                                                                                                             | Stylar                                                     | [32]                                 |
| Velloziaceae                    | <i>Vellozia squamata</i>                                                                                                                                                                                                      | Ovarian                                                    | [33]                                 |
| <b>Eudicots + Core eudicots</b> |                                                                                                                                                                                                                               |                                                            |                                      |
| Family                          | Species                                                                                                                                                                                                                       | SI inhibition                                              | Reference                            |
| Amaranthaceae                   | <i>Beta vulgaris</i>                                                                                                                                                                                                          | Stylar, gametophytic control,<br>four loci                 | [34, 35]                             |
| Balanophoraceae                 | <i>Balanophora kuroiwai</i> , <i>B. tobiracola</i>                                                                                                                                                                            | Stylar                                                     | [36]                                 |
| Cactaceae                       | <i>Schlumbergera x buckleyi</i>                                                                                                                                                                                               | Stylar, gametophytic control,<br>one locus                 | [37]                                 |
| Caryophyllacea                  | <i>Cerastium arvense</i> ssp. <i>stricturn</i><br><i>Stellaria holostea</i>                                                                                                                                                   | Stigmatic, sporophytic-<br>gametophytic control, four loci | [38-41]                              |
| Droseraceae                     | <i>Drosera eneabba</i> , <i>D. manniana</i> , <i>D. gigantea</i> , <i>D. menziesii</i> ssp. <i>menziessi</i> ,<br><i>D. radicans</i> , <i>D. stolonifera</i> ssp. <i>rupicola</i> , <i>D. rosulata</i> , <i>D. orbiculata</i> | Stigmatic                                                  | [42]                                 |
| Droseraceae                     | <i>Drosera macrantha</i> ssp. <i>macrantha</i> <i>D. tubbaestylis</i> <i>D. bulbosa</i> ssp. <i>major</i> ,<br><i>D. sp. cf. bulbosa</i> ‘Wongan Hills’, <i>D. erythrorrhiza</i> .                                            | Stylar                                                     | [42]                                 |
| Droseraceae                     | <i>Drosera menziesii</i> ssp. <i>basifolia</i> , <i>D. auriculata</i>                                                                                                                                                         | Ovarian                                                    | [42]                                 |
| Nyctaginaceae                   | <i>Bougainvillea grava</i>                                                                                                                                                                                                    | Stigmatic, sporophytic control,<br>one locus               | [43]                                 |

|                                |                                                                                                                                           |                                                 |                              |
|--------------------------------|-------------------------------------------------------------------------------------------------------------------------------------------|-------------------------------------------------|------------------------------|
| Papaveraceae                   | <i>Papaver rhoeas</i>                                                                                                                     | Stigmatic, gametophytic control,<br>one locus   | [44]                         |
| Proteaceae                     | <i>Macadamia integrifolia</i>                                                                                                             | Stylar                                          | [45]                         |
| Proteaceae                     | <i>Roupala montana</i><br><i>Telopea speciocissima</i>                                                                                    | Ovarian                                         | [46]<br>[47]                 |
| Ranunculaceae                  | <i>Caltha palustris</i><br><i>Ranunculus acris</i> , <i>R. Bulbosus</i> , <i>R. polyanthemus</i> .<br><i>R. repens</i>                    | Stigmatic, gametophytic control,<br>four loci   | [48]<br>[35, 49]<br>[50-52]  |
| Family                         | <i>Species</i>                                                                                                                            | SI inhibition                                   | Reference                    |
| <b>Asterids 1 + Asterids 2</b> |                                                                                                                                           |                                                 |                              |
| Apocynaceae                    | <i>Apocynum cannabinum</i>                                                                                                                | Ovarian                                         | [53]                         |
| Argophyllaceae                 | <i>Corokia cotonoaster</i>                                                                                                                | Ovarian                                         | [54]                         |
| Asteraceae                     | <i>Crepis foetida</i> subsp. <i>rhoeadifolia</i><br><i>Parthenium argentatum</i><br><i>Aster furcatus</i><br><i>Ageratum houstonianum</i> | Stigmatic, sporophytic control,<br>one locus    | [55]<br>[56]<br>[57]<br>[58] |
| Asteraceae                     | <i>Senecio squalidus</i>                                                                                                                  | Stigmatic, sporophytic-<br>gametophytic control | [59, 60]                     |
| Boraginaceae                   | <i>Anchusa officinalis</i> , <i>Borago officinalis</i>                                                                                    | Ovarian                                         | [7]                          |
| Campanulaceae                  | <i>Campanula rapunculoides</i>                                                                                                            | Stylar, gametophytic control,<br>one locus      | [61]                         |
| Convolvulaceae                 | <i>Ipomea setifera</i><br><i>Ipomea leucantha</i><br><i>Ipomea trifida</i><br><i>Convolvulus arvensis</i>                                 | Stigmatic, sporophytic control<br>one locus     | [62]<br>[63]<br>[64]<br>[65] |
| Cornaceae                      | <i>Cornus sericeae</i>                                                                                                                    | Stylar, gametophytic control,<br>one locus      | [66]                         |
| Hydrangeaceae                  | <i>Cornus florida</i>                                                                                                                     | Stylar                                          | [67]                         |
| Lamiaceae                      | <i>Tectona grandis</i>                                                                                                                    | Ovarian                                         | [68]                         |
| Myrsinaceae                    | <i>Anagallis monelli</i>                                                                                                                  | Stylar, gametophytic control,<br>one locus      | [69]                         |
| Oleaceae                       | <i>Olea europea</i>                                                                                                                       | Stigmatic, Stylar, gametophytic<br>control      | [70]                         |
| Polemoniaceae                  | <i>Linanthus parviflorus</i><br><i>Leptosiphon jepsonii</i>                                                                               | Stigmatic, sporophytic control<br>one locus     | [71]<br>[72]                 |
| Polemoniaceae                  | <i>Phlox drumondii</i>                                                                                                                    | Stylar, gametophytic control,<br>one locus      | [73]                         |
| Polemoniaceae                  | <i>Ipomopsis aggregata</i>                                                                                                                | Ovarian                                         | [74]                         |



|                |                                                                                                                                                                                                                                                                                                                                    |                                                 |                                                  |
|----------------|------------------------------------------------------------------------------------------------------------------------------------------------------------------------------------------------------------------------------------------------------------------------------------------------------------------------------------|-------------------------------------------------|--------------------------------------------------|
|                | <i>Ipomopsis tenuifolia</i>                                                                                                                                                                                                                                                                                                        |                                                 | [75]                                             |
| Plantaginaceae | <i>Antirrhinum molle</i>                                                                                                                                                                                                                                                                                                           | Stylar, gametophytic control,<br>one locus      | [76]                                             |
| Primulaceae    | <i>Primula veris</i>                                                                                                                                                                                                                                                                                                               | Herostyly + stigmatic                           | [77]                                             |
| Primulaceae    | <i>Primula</i> spp.                                                                                                                                                                                                                                                                                                                | Herostyly + stigmatic + stylar                  | [78]                                             |
| Rubiaceae      | <i>Coussarea</i> sp., <i>Hamelia patens</i> , <i>H. xerocarpa</i> , <i>Psychotria chiapensis</i> , <i>P. officinalis</i> , <i>P. suerrensii</i> , <i>Rudnea cornifolia</i> , <i>Warsewiczia coccinea</i>                                                                                                                           | Herostyly + stigmatic + stylar                  | [79]                                             |
| Rubiaceae      | <i>Palicourea marcgravii</i> , <i>Psychotria conjugens</i> , <i>P. hygrophiloides</i> , <i>P. Nuda</i> , <i>P. sessilis</i> , <i>Rudgea karteniis</i> , <i>R. lanceolata</i>                                                                                                                                                       | Herostyly + stigmatic                           | [80]                                             |
| Rubiaceae      | <i>Palicourea longipedunculata</i> , <i>P. rigida</i> , <i>Posoquiera latifolia</i> , <i>Psychotria hastisepala</i> , <i>Rudgea cornifolia</i>                                                                                                                                                                                     | Herostyly + stylar                              | [80]                                             |
| Sapotaceae     | <i>Madhuca indica</i>                                                                                                                                                                                                                                                                                                              | Stylar                                          | [81]                                             |
| Solanaceae     | <i>Nicotiana alata</i> , <i>N. forgetiana</i><br><i>Petunia violaceae</i> , <i>P. axilaris</i><br><i>Lycopersicon peruvianum</i> var. <i>dentatum</i> , <i>L. esculentum</i> , <i>L. chilensis</i><br><i>Solanum chacoense</i><br><i>S. kurtzianum</i> , <i>S. simplicifolium</i> , <i>S. michoacanum</i><br><i>S. comeersonii</i> | Stylar, gametophytic control,<br>one locus      | [82]<br>[83]<br>[84, 85]<br>[86]<br>[87]<br>[88] |
| Solanaceae     | <i>Solanum ehrenbergii</i> <i>S. pinnatisectum</i><br><i>S. phureja</i> , <i>S. stenotomum</i><br><i>Physallis ixocarpa</i>                                                                                                                                                                                                        | Stylar, gametophytic control,<br>two loci       | [89]<br>[90]<br>[91]                             |
| Solanaceae     | <i>Lycium cestroides</i>                                                                                                                                                                                                                                                                                                           | Ovarian                                         | [92]                                             |
| Styracaceae    | <i>Styrax ferrugineus</i>                                                                                                                                                                                                                                                                                                          | Ovarian                                         | [93]                                             |
| Theaceae       | <i>Thea sinensis</i>                                                                                                                                                                                                                                                                                                               | Stylar, gametophytic control,<br>one locus      | [94]                                             |
| Verbenaceae    | <i>Lantana camara</i>                                                                                                                                                                                                                                                                                                              | Stylar                                          | [95]                                             |
| <b>Rosids</b>  |                                                                                                                                                                                                                                                                                                                                    |                                                 |                                                  |
| Brassicaceae   | <i>Iberis amara</i><br><i>Cardamine pratensis</i> , <i>Capsella grandiflora</i> , <i>Brassica oleracea</i> , <i>Raphanus sativus</i> , <i>Brassica campestris</i><br><i>Leavenworthia crassa</i><br><i>Eruca sativa</i>                                                                                                            | Stigmatic, sporophytic control,<br>one locus    | [96]<br>[97]<br>[98]<br>[99]                     |
| Brassicaceae   | <i>Brassica campestris</i><br><i>Raphanus sativus</i>                                                                                                                                                                                                                                                                              | Stigmatic, sporophytic-<br>gametophytic control | [100]<br>[101]                                   |
| Betulaceae     | <i>Betula verrucosa</i> , <i>B. pubescens</i>                                                                                                                                                                                                                                                                                      | Stylar, gametophytic control one<br>locus       | [102]                                            |
| Betulaceae     | <i>Corylus avellana</i>                                                                                                                                                                                                                                                                                                            | Stigmatic, sporophytic control,<br>one locus    | [103]                                            |
| Bixaceae       | <i>Cochlospermum vitifolium</i>                                                                                                                                                                                                                                                                                                    | Ovarian                                         | [7]                                              |
| Burseraceae    | <i>Boswellia serrata</i>                                                                                                                                                                                                                                                                                                           | Stigmatic                                       | [104]                                            |

|                  |                                                                                      |                                                      |                |
|------------------|--------------------------------------------------------------------------------------|------------------------------------------------------|----------------|
| Capparaceae      | <i>Capparis pittierii</i><br><i>Capparis jacobinae</i>                               | Ovarian                                              | [79]<br>[105]  |
| Cistaceae        | <i>Cistus carthaginiensis</i><br><i>C. ladanifer</i>                                 | Stylar                                               | [106]<br>[107] |
| Chrysobalanaceae | <i>Hirtella glandulosa</i>                                                           | Ovarian                                              | [108]          |
| Clusiaceae       | <i>Kielmeyera coriacea</i> , <i>K. speciosa</i>                                      | Ovarian                                              | [109]          |
| Dipterocarpaceae | <i>Dipterocarpus tempehes</i>                                                        | Stigmatic, ovarian                                   | [110]          |
| Erythroxylaceae  | <i>Erythroxylum suberosum</i> , <i>E. tortuosum</i>                                  | Heterostyly + Stylar                                 | [109]          |
| Euphorbiaceae    | <i>Mabea fistulifera</i>                                                             | Stigmatic                                            | [111]          |
| Fabaceae         | <i>Trifolium repens</i>                                                              | Stylar, gametophytic control one locus               | [112, 113]     |
| Fabaceae         | <i>Lotus tenuis</i>                                                                  | Stylar, gametophytic control three or four loci      | [114]          |
| Fabaceae         | <i>Lotus corniculatus</i>                                                            | Ovarian, gametophytic control one locus              | [115, 116]     |
| Fabaceae         | <i>Tylosema esculentum</i>                                                           | Stylar, heterostily                                  | [117]          |
| Fabaceae         | <i>Inga brenesii</i>                                                                 | Stylar                                               | [118]          |
| Fabaceae         | <i>Acacia retinoides</i>                                                             | Ovarian                                              | [119]          |
| Fagaceae         | <i>Castanea molissima</i>                                                            | Ovarian                                              | [120]          |
| Malpighiaceae    | <i>Mascagnia anisopetala</i> , <i>Stigmaphyllon lalandianum</i> , <i>S. paralias</i> | Ovarian                                              | [121]          |
| Malvaceae        | <i>Cola nitida</i>                                                                   | Stigmatic, sporophytic control, one locus            | [122]          |
| Malvaceae        | <i>Abutilon hybridum</i>                                                             | Stigmatic, gametophytic control, one locus           | [123]          |
| Malvaceae        | <i>Luehea grandiflora</i>                                                            | Stylar                                               | [124]          |
| Malvaceae        | <i>Theobroma cacao</i>                                                               | Ovarian, gametophytic-sporophytic control, one locus | [125]          |
| Onagraceae       | <i>Oenothera rhombipetala</i>                                                        | Stigmatic, gametophytic control, one locus           | [126]          |
| Onagraceae       | <i>Oenothera organensis</i>                                                          | Stigmatic, Stylar gametophytic control, one locus    | [127]          |
| Onagraceae       | <i>Ludwigia sericea</i> , <i>L. nervosa</i>                                          | Stylar                                               | [128]          |
| Onagraceae       | <i>Epilobium obcordatum</i>                                                          | Ovarian                                              | [129]          |
| Paeoniaceae      | <i>Paeonia jishanensis</i>                                                           | Ovarian                                              | [130]          |
| Passifloraceae   | <i>Passiflora edulis</i> f. <i>flavicarpa</i>                                        | Stigmatic, Stylar gametophytic-sporophytic control   | [131, 132]     |
| Rhamnaceae       | <i>Discaria toumatou</i>                                                             | Stigmatic                                            | [133]          |
| Rhamnaceae       | <i>Frangula alnus</i>                                                                | Stylar                                               | [134]          |
| Rosaceae         | <i>Malus domestica</i>                                                               | Stylar, gametophytic control,                        | [135]          |

|               |                                                                                                                                    |                                        |                                       |
|---------------|------------------------------------------------------------------------------------------------------------------------------------|----------------------------------------|---------------------------------------|
|               | <i>Prunus</i> spp.<br><i>Pyrus</i> spp.<br><i>Rubus arcticus</i>                                                                   | one locus                              | [136, 137]<br>[138]<br>[139]<br>[140] |
| Rutaceae      | <i>Citrus grandis</i>                                                                                                              | Stylar, gametophytic control one locus | [141, 142]                            |
| Saxifragaceae | <i>Heuchera micrantha</i> var. <i>diversifolia</i>                                                                                 | Ovarian                                | [143]                                 |
| Turneraceae   | <i>Turnera</i> spp., <i>Piriqueta</i> spp.                                                                                         | Heterostyly + stigmatic+ stylar        | [144]                                 |
| Vochysiaceae  | <i>Vochysia elliptica</i> , <i>V. pumila</i> , <i>V. pyramidalis</i> , <i>V. rufa</i> , <i>V. thyrsoidea</i> , <i>V. tucanorum</i> | Stylar                                 | [145]                                 |
| Vochysiaceae  | <i>Qualea grandiflora</i> <i>Q. multiflora</i>                                                                                     | Stylar                                 | [146]                                 |

## REFERENCES

- Bernhardt, P., et al., *The Pollination of Trimenia moorei (Trimeniaceae): Floral volatiles, insect/wind pollen vectors and stigmatic self-incompatibility in a basal angiosperm*. Annals of Botany, 2003. **92**(3): p. 445-458.
- Nagamitsu, T. and T. Inoue, *Cockroach pollination and breeding system of Uvaria elmeri (Annonaceae) in a lowland mixed-dipterocarp forest in Sarawak*. Am. J. Bot., 1997. **84**(2): p. 208-.
- Pontieri, V. and T.L. Sage, *Evidence for stigmatic self-incompatibility, pollination induced ovule enlargement and transmitting tissue exudates in the paleoherb, Saururus cernuus L. (Saururaceae)*. Annals of Botany, 1999. **84**(4): p. 507-519.
- Sage, T.L. and F.B. Sampson, *Evidence for ovarian self-incompatibility as a cause of self-sterility in the relictual woody angiosperm, Pseudowintera axillaris (Winteraceae)*. Annals of Botany, 2003. **91**(7): p. 807-816.
- Vuille, F.-L., *The reproductive biology of the genus Baldellia (Alismataceae)*. Plant Systematics and Evolution, 1988. **159**(3): p. 173-183.
- Sage, T.L., et al., *Differential ovule development following self- and cross-pollination: the basis of self-sterility in Narcissus triandrus (Amaryllidaceae)*. American Journal of Botany, 1999. **86**(6): p. 855-870.
- Seavey, S. and K. Bawa, *Late-acting self-incompatibility in angiosperms*. The Botanical Review, 1986. **52**(2): p. 195-219.
- Brewbaker, J.L. and D.D. Gorrez, *Genetics of self-incompatibility in the monocot genera, Ananas (Pineapple) and Gasteria*. American Journal of Botany, 1967. **54**(5): p. 611-616.
- Zdenka, H., et al., *The biology of Butomus umbellatus in shallow waters with fluctuating water level*. Hydrobiologia, 1996. **340**(1): p. 27-30.
- Annerstedt, I. and A. Lundqvist, *Genetics of self-incompatibility in Tradescantia paludosa (Commelinaceae)*. Hereditas, 1967. **58**(1-2): p. 13-30.
- Owens, S.J., *Self-incompatibility in the Commelinaceae*. Annals of Botany, 1981. **47**(5): p. 567-581.

12. Stout, A.B. and C. Chandler, *Pollen-tube behavior in Hemerocallis with special reference to incompatibilities*. Bulletin of the Torrey Botanical Club, 1933. **60**(6): p. 397-416.
13. Kingston, B.L., *Papillate tepal noods and delayed pollen germination in Albuca L. (Liliaceae)*. Annals of Botany, 1998. **82**(2): p. 263-266.
14. Chichiricò, G., *Self-incompatibility in Crocus vernus subsp. vernus (Iridaceae)*. Plant Systematics and Evolution, 1990. **172**(1): p. 77-82.
15. Chichiricò, G., *Pregamic and postgamic self-incompatibility systems in Crocus (Iridaceae)*. Plant Systematics and Evolution, 1993. **185**(3 - 4): p. 219-227.
16. Chichiricò, G., *Intra- and interspecific reproductive barriers in Crocus (Iridaceae)*. Plant Systematics and Evolution, 1996. **201**(1 - 4): p. 83-92.
17. Chichiricò, G., P. Aimola, and A.M. Ragnelli, *Ultrastructural study of intra- and interspecific pollen tube rejection in Crocus (Iridaceae)*. Caryologia, 1997. **50**(3-4): p. 289-301.
18. Lundqvist, A., *Four-locus S-gene control of self-incompatibility made probable in Lilium martagon (Liliaceae)*. Hereditas, 1991. **114**(1): p. 57-63.
19. Ascher, P.D. and S.J. Peloquin, *Pollen tube growth and incompatibility following intra- and inter-specific pollinations in Lilium longiflorum*. American Journal of Botany, 1968. **55**(10): p. 1230-1234.
20. Brock, R.D., *Fertility in Lilium hybrids*. Heredity, 1954. **8**: p. 409-420.
21. Sage, T.L., et al., *Stigmatic Self-Incompatibility and Mating Patterns in Trillium grandiflorum and Trillium erectum (Melanthiaceae)*. Annals of Botany, 2001. **88**(5): p. 829-841.
22. Barbosa, A., M. de Melo, and E. Borba, *Self-incompatibility and myophily in Octomeria (Orchidaceae, Pleurothallidinae) species*. Plant Systematics and Evolution, 2009. **283**(1): p. 1-8.
23. Gontijo, S.L., et al., *Occurrence of different sites of self-incompatibility reaction in four Anathallis (Orchidaceae, Pleurothallidinae) species*. Plant Species Biology, 2010. **25**(2): p. 129-135.
24. Johansen, B.O., *Incompatibility in Dendrobium (Orchidaceae)*. Botanical Journal of the Linnean Society, 1990. **103**(2): p. 165-196.
25. Borba, E.L., J. Semir, and G.J. Shepherd, *Self-incompatibility, inbreeding depression and crossing potential in five Brazilian Pleurothallis (Orchidaceae) species*. Annals of Botany, 2001. **88**(1): p. 89-99.
26. Lundqvist, A., *Studies on self-sterility in rye, Secale cereale L.* Hereditas, 1954. **40**(3-4): p. 278-294.
27. Hayman, D.L., *The genetical control of incompatibility in Phalaris coerulescens*. Australian Journal of Biological Sciences, 1956. **9**: p. 321-331.
28. Fearon, C.H., M.D.a. Hayward, and M.J. Lawrence, *Self-incompatibility in rye grass. V. Genetic control, linkage and seed set in diploid Lolium multiflorum Lam.* Heredity, 1983. **50**: p. 35-46.
29. Lundqvist, A., *Self-incompatibility in Festuca pratensis Huds.* Hereditas, 1961. **47**(3-4): p. 542-562.
30. Cornish, M.A., M.D. Hayward, and M.J. Lawrence, *Self-incompatibility in ryegrass*. Heredity, 1980. **44**(1): p. 55-62.
31. Spoor, W., *Self-incompatibility in Lolium perenne L.* Heredity, 1976. **37**(3): p. 417-421.
32. Kress, W.J. and D.E. Stone, *Morphology and Floral Biology of Phenakospermum (Strelitziaceae), an Arborescent Herb of the Neotropics*. Biotropica, 1993. **25**(3): p. 290-300.

33. Oliveira, P.E., P.E. Gibbs, and M. Bianchi, *Pollination and breeding system of Vellozia squamata (Liliales, Velloziaceae) - A species of the Brazilian Cerrados*. Botanica Acta, 1991. **104**(5): p. 392-398.
34. Larsen, K., *Self-incompatibility in Beta vulgaris L.* Hereditas, 1977. **85**(2): p. 227-248.
35. Lundqvist, A., et al., *Complex self-incompatibility systems in Ranunculus acris L. and Beta vulgaris L.* Hereditas, 1973. **74**(2): p. 161-168.
36. Kawakita, A. and M. Kato, *Floral biology and unique pollination system of root holoparasites, Balanophora kuroiwai and B. tobiracola (Balanophoraceae)*. Am. J. Bot., 2002. **89**(7): p. 1164-1170.
37. Boyle, T.H., *The genetics of self-incompatibility in the genus Schlumbergera (Cactaceae)*. Journal of Heredity, 1997. **88**(3): p. 209-214.
38. Lundqvist, A., *One-locus sporophytic self-incompatibility in the carnation family, Caryophyllaceae*. Hereditas, 1979. **91**: p. 307.
39. Lundqvist, A., *One-locus sporophytic S-gene system with traces of gametophytic pollen control in Cerastium arvense ssp. strictum (Caryophyllaceae)\**. Hereditas, 1990. **113**(3): p. 203-215.
40. Lundqvist, A., *"Slow" and "quick" S-alleles without dominance interaction in the sporophytic one-locus self-incompatibility system of Stellaria holostea (Caryophyllaceae)*. Hereditas, 1994. **120**(3): p. 191-202.
41. Lundqvist, A., *Concealed genes for self-incompatibility in the carnation family Caryophyllaceae?* Hereditas, 1995. **122**(1): p. 85-89.
42. Chen, L., S. James, H., and H. Stace, M., *Self-incompatibility, seed abortion and clonality in the breeding systems of several Western Australian Drosera species (Droseraceae)*. Australian Journal of Botany, 1997. **45**(1): p. 191-201.
43. Zadoo, S.N., R.P. Roy, and T.N. Khoshoo, *Cytogenetics of cultivated Bougainvilleas. V. Induced tetraploidy and restoration of fertility in sterile cultivars*. Euphytica, 1975. **24**(2): p. 517-524.
44. Lawrence, M.J., *The genetics of self-incompatibility in Papaver rhoeas*. Proceedings of the Royal Society of London. Series B, Biological Sciences, 1975. **188**(1092): p. 275-285.
45. Sedgley, M., M.A. Blesing, and H.I.M.V. Vithanage, *A developmental study of the structure and pollen receptivity of the macadamia pistil in relation to protandry and self-incompatibility*. Botanical Gazette, 1985. **146**(1): p. 6-14.
46. Oliveira, P.E. and P.E. Gibbs, *Reproductive biology of woody plants in a Cerrado community of Central Brazil*. Flora, 2000. **195**:: p. 311-329.
47. Offord, C.A., *An examination of the reproductive biology of Telopea speciosissima (Proteaceae) with emphasis on the nature of protandry and the role of self-pollination in fruit set*. International Journal of Plant Sciences, 2004. **165**(1): p. 73-83.
48. Lundquist, A., *The self-incompatibility system in Caltha palustris (Ranunculaceae)*. Hereditas, 1992. **117**: p. 145-151.
49. ØSterbye, U., *Self-incompatibility in Ranunculus acris L.* Hereditas, 1975. **80**(1): p. 91-112.
50. Lundqvist, A., *The Self-incompatibility system in Ranunculus repens (Ranunculaceae)*. Hereditas, 1994. **120**(2): p. 151-157.
51. Lundqvist, A., *Disomic control of self-incompatibility in the tetraploid Ranunculus repens (Ranunculaceae)*. Hereditas, 1998. **128**(2): p. 181-183.

52. Lundquist, A., *The complex S-gene system for control of self-incompatibility in the buttercup genus Ranunculus*. Hereditas, 1990. **113**: p. 29-46.
53. Lipow, S.R. and R. Wyatt, *Floral morphology and late-acting self-incompatibility in Apocynum cannabinum (Apocynaceae)*. Plant Systematics and Evolution, 1999. **219**(1): p. 99-109.
54. Webb, C.J., *Pollination, self-incompatibility, and fruit production in Corokia cotoneaster (Escalloniaceae)*. New Zealand Journal of Botany, 1994. **32**: p. 385-396.
55. Hughes, M.B. and E.B. Babcock, *Self-incompatibility in Crepis foetida (L.) subsp. rhoeadifolia (Bieb.) Schinz et Keller*. Genetics, 1950. **35**(5): p. 570-588.
56. Gerstel, D.U., *Self-Incompatibility Studies in Guayule II. Inheritance*. Genetics, 1950. **35**(4): p. 482-506.
57. Reinartz, J.A. and D.H. Les, *Bottleneck-Induced Dissolution of Self-Incompatibility and Breeding System Consequences in Aster furcatus (Asteraceae)*. American Journal of Botany, 1994. **81**(4): p. 446-455.
58. Stephens, L.C., P.D. Ascher, and R.E. Widmer, *Genetics of self incompatibility in diploid Ageratum houstonianum Mill.* TAG Theoretical and Applied Genetics, 1982. **63**(4): p. 387-394.
59. Hiscock, S.J., *Self-incompatibility in Senecio squalidus L. (Asteraceae)*. Annals of Botany, 2000. **85**(Suppl. A): p. 181-190.
60. Hiscock, S.J., et al., *The stigma surface and pollen-stigma interactions in Senecio squalidus L. (Asteraceae) following cross (compatible) and self (incompatible) pollinations*. International Journal of Plant Sciences, 2002. **163**(1): p. 1-16.
61. Good-Avila, S.V., et al., *Characterization of self-incompatibility in Campanula rapunculoides (Campanulaceae) through genetic analyses and microscopy*. Botany, 2008. **86**(1): p. 1-13.
62. Martin, F.W., *The system of self-incompatibility in Ipomoea*. Journal of Heredity, 1968. **59**(5): p. 263-267.
63. Kowyama, Y., N. Shimano, and T. Kawase, *Genetic analysis of incompatibility in the diploid Ipomoea species closely related to the sweet potato*. TAG Theoretical and Applied Genetics, 1980. **58**(3): p. 149-155.
64. Kowyama, Y., T. Tsuchiya, and K. Kakeda, *Sporophytic self-incompatibility in Ipomoea trifida, a close relative of sweet potato*. Annals of Botany, 2000. **85**(suppl 1): p. 191-196.
65. Westwood, J.H., T. Tominaga, and S.C. Weller, *Characterization and breakdown of self-incompatibility in field bindweed (Convolvulus arvensis L.)*. Journal of Heredity, 1997. **88**(6): p. 459-465.
66. Hummel, R.L., P.D. Ascher, and H.M. Pellett, *Genetic control of self-incompatibility in red-osier dogwood*. Journal of Heredity, 1982. **73**(4): p. 308-309.
67. Reed, S.M., *Self-incompatibility in Cornus florida*. HortScience : a publication of the American Society for Horticultural Science., 2004. **39**(2): p. 335-338.
68. Tangmitcharoen, S. and J.N. Owens, *Pollen viability and pollen-tube growth following controlled pollination and their relation to low fruit production in Teak (Tectona grandis Linn. f.)*. Annals of Botany, 1997. **80**(4): p. 401-410.
69. Talavera, S., et al., *Genetic control of self-incompatibility in Anagallis monelli (Primulaceae: Myrsinaceae)*. Heredity, 2001. **87**(5): p. 589-597.
70. Cuevas, J., L. Rallo, and H.F. Rapoport, *Staining procedure for the observation of olive pollen tube behaviour*. Acta Hort. (ISHS), 1994. **356**: p. 264-267.
71. Goodwillie, C., *The genetic control of self-incompatibility in Linanthus parviflorus (Polemoniaceae)*. Heredity, 1997. **79**(4): p. 424-432.

72. Goodwillie, C., K.L. Partis, and J.W. West, *Transient self-incompatibility confers delayed selfing in Leptosiphon jepsonii (Polemoniaceae)*. International Journal of Plant Sciences, 2004. **165**(3): p. 387-394.
73. Levin, D.A., *S-gene polymorphism in Phlox drummondii*. Heredity, 1993. **71**(2): p. 193-198.
74. Sage, T.L., M.V. Price, and N.M. Waser, *Self-sterility in Ipomopsis aggregata (Polemoniaceae) is due to prezygotic ovule degeneration*. Am. J. Bot., 2006. **93**(2): p. 254-262.
75. LaDoux, T. and E.A. Friar, *Late-acting self-incompatibility in Ipomopsis tenuifolia (Gray) V. Grant (Polemoniaceae)*. International Journal of Plant Sciences, 2006. **167**(3): p. 463-471.
76. Harrison, B.J. and L.A. Darby, *Unilateral hybridization*. Nature, 1955. **176**(4490): p. 982-982.
77. Richards, A.J. and H.B. Ibrahim, *The Breeding System in Primula veris L. II. Pollen Tube Growth and Seed-Set*. New Phytologist, 1982. **90**(2): p. 305-314.
78. Wedderburn, F. and A.J. Richards, *Variation in within-morph incompatibility inhibition sites in heteromorphic Primula L.* New Phytologist, 1990. **116**(1): p. 149-162.
79. Bawa, K.S., et al., *Reproductive biology of tropical lowland rain forest trees. II. Pollination systems*. American Journal of Botany, 1985. **72**(3): p. 346-356.
80. Pereira, Z.V., M.F. Vieira, and R.M.d. Carvalho-Okano, *Fenologia da floração, morfologia floral e sistema de incompatibilidade em espécies distílicas de Rubiaceae em fragmento florestal do Sudeste brasileiro*. Revista Brasileira de Botânica, 2006. **29**(3): p. 471-480.
81. Kuruvilla, P.K. and J.J. Shah, *Development and histochemistry of style and stigma, and pollen-pistil interaction in Madhuca indica (Sapotaceae)*. Annals of Botany, 1988. **61**(3): p. 269-281.
82. East, E.M. and A.J. Mangelsdorf, *A new interpretation of the hereditary behavior of self-sterile plants*. Proceedings of the National Academy of Sciences of the United States of America, 1925. **11**(2): p. 166-171.
83. Mather, K., *Specific differences in Petunia*. Journal of Genetics, 1943. **45**(3): p. 215-235.
84. Martin, F.W., *The inheritance of self-incompatibility in hybrids of Lycopersicon esculentum Mill. X L. chilense Dun.* Genetics, 1961. **46**(11): p. 1443-1454.
85. Martin, F.W., *The behavior of Lycopersicon incompatibility alleles in an alien genetic milieu*. Genetics, 1968. **60**(1): p. 101-109.
86. Pal, B.P. and P. Nath, *Genetic nature of self- and cross-incompatibility in potatoes*. Nature, 1942. **149**: p. 246-247.
87. Pandey, K.K., *Incompatibility in some Solanum crosses*. Genetica, 1963. **33**(1): p. 24-30.
88. Trognitz, B.R., *Analysis of pollen tube growth in situ to investigate self-incompatibility in the wild potato Solanum commersonii*. Euphytica, 1995. **86**(2): p. 149-156.
89. Pandey, K.K., *Self-incompatibility system in two Mexican species of Solanum*. Nature, 1960. **185**(4711): p. 483-484.
90. Abdalla, M.M.F. and J.G.T. Hermsen, *A two-loci system of gametophytic incompatibility in Solanum phureja and S. stenotomum*. Euphytica, 1971. **20**(3): p. 345-350.
91. Pandey, K.K., *Genetics of self-incompatibility in Physalis ixocarpa Brot. -- A New System*. American Journal of Botany, 1957. **44**(10): p. 879-887.

92. Aguilar, R. and G. Bernardello, *The breeding system of Lycium cestroides: a Solanaceae with ovarian self-incompatibility*. Sexual Plant Reproduction, 2001. **13**(5): p. 273-277.
93. Carneiro, S.L., O. Cesar, and R. Monteiro, *Biologia da polinizacao e sistema de reproducao de Styrox camporum Pohl e S. ferrugineus Nees et Mart. (Styracaceae)*  
*Pollination biology and breeding system of Styrox camporum Pohl and S. ferrugineus Nees et Mart. (Styracaceae)*. Revista Brasileira Botanica, 1988 **11**. (1-2): 71-80 (1988).
94. Fuchinoue, Y., *Analysis of self-incompatibility alleles of major varieties of tea*. Japanese Agricultural Research Quarterly, 1979. **13**: p. 43.
95. Granja Barros, M., V. Rico Gray, and C. Díaz Castelazo, *Sincronia de floração entre Lantana c  
a L. (Verbenaceae) e Psittacanthus calyculatus (DC.) G. Don (Loranthaceae) ocorrentes nas dunas de La Mancha, Veracruz, México*. Acta Botánica Mexicana, 2001. **57**: p. 1-14.
96. Bateman, A.J., *Self-incompatibility systems in angiosperms II. Iberis amara*. Heredity, 1954. **8**(3): p. 305-332.
97. Bateman, A.J., *Self-incompatibility systems in angiosperms: III. Cruciferae*. Heredity, 1955. **9**(1): p. 53-68.
98. Lloyd, D.G., *The genetics of self-incompatibility in Leavenworthia crassa Rollins (Cruciferae)*. Genetica, 1967. **38**(1): p. 227-242.
99. Verma, S.C., R. Malik, and I. Dhir, *Genetics of the incompatibility system in the crucifer Eruca sativa L*. Proceedings of the Royal Society of London. Series B, Biological Sciences, 1977. **196**(1123): p. 131-159.
100. Zuberi, M.I. and D. Lewis, *Gametophytic-sporophytic incompatibility in the Cruciferae - Brassica campestris*. Heredity, 1988. **61**(3): p. 367-377.
101. Lewis, D., S.C. Verma, and M.I. Zuberi, *Gametophytic-sporophytic incompatibility in the Cruciferae-Raphanus sativus*. Heredity, 1988. **61**(3): p. 355-366.
102. Hagman, M., *Incompatibility in Forest Trees*. Proceedings of the Royal Society of London. Series B, Biological Sciences, 1975. **188**(1092): p. 313-326.
103. Thompson, M.M., *Genetics of incompatibility Corylus avellana L*. TAG Theoretical and Applied Genetics, 1979. **54**(3): p. 113-116.
104. Sunnichan, V.G., H.Y. Mohan Ram, and K.R. Shivanna, *Reproductive biology of Boswellia serrata, the source of salai guggul, an important gum-resin*. Botanical Journal of the Linnean Society, 2005. **147**(1): p. 73-82.
105. Primo, L.M. and I.C. Machado, *A new case of late-acting self-incompatibility in Capparis L. (Brassicaceae): C. jacobinae Moric. ex Eichler, an endemic andromonoecious species of the Caatinga, Pernambuco State, Brazil*. Acta Botanica Brasilica, 2009. **23**: p. 764-768.
106. Boscaiu, M. and J. Güemes, *Breeding system and conservation strategy of the extremely endangered Cistus carthaginensis Pau (Cistaceae) of Spain*. Israel Journal of Plant Sciences, 2001. **49**(3): p. 213-220.
107. Talavera, S., P.E. Gibbs, and J. Herrera, *Reproductive biology of Cistus ladanifer (Cistaceae)*. Plant Systematics and Evolution, 1993. **186**(3): p. 123-134.
108. Arista, M., et al., *Pollination and breeding system of two co-occurring Hirtella species (Chrysobalanaceae) in central Brazil*. Botanical Acta, 1997. **110**(6): p. 496-502.
109. Granja Barros, M., *Floração sincrônica e sistemas reprodutivos em quatro espécies de Kielmeyera Mart. (Guttiferae)*. Acta Botanica Brasilica, 2002. **16**: p. 113-122.



110. Kenta, T., et al., *Multiple factors contribute to outcrossing in a tropical emergent Dipterocarpus tempehes, including a new pollen-tube guidance mechanism for self-incompatibility*. American Journal of Botany, 2002. **89**(1): p. 60-66.
111. Vieira, M.F. and R.M. de Carvalho-Okano, *Pollination Biology of Mabea fistulifera (Euphorbiaceae) in Southeastern Brazil*. Biotropica, 1996. **28**(1): p. 61-68.
112. Atwood, S.S., *Oppositional alleles causing cross-incompatibility in Trifolium repens*. Genetics, 1942. **27**(3): p. 333-338.
113. Atwood, S.S., *Oppositional alleles in natural populations of Trifolium repens*. Genetics, 1944. **29**(5): p. 428-435.
114. Lundqvist, A., *The Self-Incompatibility system in Lotus tenuis (Fabaceae)*. Hereditas, 1993. **119**(1): p. 59-66.
115. Bubar, J.S. and R.K. Miri, *Inheritance of self-incompatibility and Brown Keel Tip in Lotus corniculatus L.* Nature, 1965. **205**(4975): p. 1035-1036.
116. Bubar, J.S., *An association between variability in ovule development within ovaries and self-incompatibility in Lotus (leguminosae)*. Canadian Journal of Botany, 1958. **36**(1): p. 65-72.
117. Hartley, M.L., E. Tshamekeng, and S.M. Thomas, *Functional Heterostyly in Tylosema esculentum (Caesalpinioideae)*. Annals of Botany, 2002. **89**(1): p. 67-76.
118. Koptur, S., *Outcrossing and Pollinator Limitation of Fruit Set: Breeding Systems of Neotropical Inga Trees (Fabaceae: Mimosoideae)*. Evolution, 1984. **38**(5): p. 1130-1143.
119. Kenrick, J. and R.B. Knox, *Self-incompatibility in the nitrogen-fixing tree Acacia retinodes quantitative cytology of pollen tube growth*. TAG Theoretical and Applied Genetics, 1985. **69**(5): p. 481-488.
120. McKay, J.W., *Self-sterility in the Chinese chestnut (Castanea mollissima)*. Proceedings of the American Society of Horticultural Sciences, 1942. **4**: p. 156-160.
121. Sigrist, M.R. and M. Sazima, *Pollination and Reproductive Biology of Twelve Species of Neotropical Malpighiaceae: Stigma Morphology and its Implications for the Breeding System*. Annals of Botany, 2004. **94**(1): p. 33-41.
122. Jacob, V.J., *Self-incompatibility mechanism in Cola nitida*. Incompatibility Newsletter, 1973 **3**: p. 60-61.
123. Pandey, K.K., *Incompatibility in Abutilon 'Hybridum'*. American Journal of Botany, 1960. **47**(10): p. 877-883.
124. Gibbs, P.E., P.E. Oliveira, and N. Taroda Ranga, *Homomorphic self-incompatibility, with stylar rejection site, in Luehea grandiflora Mart. and Zucc. (Tiliaceae-Malvaceae s.l.)*. Plant biol (Stuttg), 2003. **5**(04): p. 419,422.
125. Cope, F.W., *The effects of incompatibility and compatibility on genotype proportions in populations of Theobroma cacao*. Heredity, 1962. **17**: p. 183-195.
126. Bali, P.N. and A. Hecht, *The genetics of self-incompatibility Oenothera rhombipetala*. Genetica, 1965. **36**(1): p. 159-171.
127. Emerson, S., *The genetics of self-incompatibility in Oenothera organensis*. Genetics, 1938. **23**(2): p. 190-202.
128. Vieira, A.O.S., *Biologia reprodutiva e hibridação em espécies sintópicas de Ludwigia (Onagraceae) no sudeste do Brasil*, 2002, Biblioteca Digital da Unicamp.
129. Seavey, S.R. and S.K. Carter, *Ovule fates in Epilobium obcordatum (Onagraceae)*. American Journal of Botany, 1996. **83**(3): p. 316-325.

130. Zhou, S.-L., D.-Y. Hong, and K.-Y. Pan, *Pollination biology of Paeonia jishanensis* T. Hong & W.Z. Zhao (*Paeoniaceae*), with special emphasis on pollen and stigma biology. Botanical Journal of the Linnean Society, 1999. **130**(1): p. 43-52.
131. Rêgo, M.M., et al., *Pollen tube behavior in yellow passion fruit following compatible and incompatible crosses*. TAG Theoretical and Applied Genetics, 2000. **101**(5): p. 685-689.
132. Suassuna, d.M.F.T., et al., *Self-incompatibility in passionfruit: evidence of gametophytic-sporophytic control*. TAG Theoretical and Applied Genetics, 2003. **106**(2): p. 298-302.
133. Webb, C.J., *Protandry, pollination, and self-incompatibility in Discaria toumatou*. New Zealand Journal of Botany, 1985. **23**: p. 331-335.
134. Medan, D., *Reproductive biology of Frangula alnus (Rhamnaceae) in southern Spain*. Plant Systematics and Evolution, 1994. **193**(1): p. 173-186.
135. Crane, M. and W. Lawrence, *Genetical studies in cultivated apples*. Journal of Genetics, 1933. **28**(2): p. 265-296.
136. Crane, M., *Self-sterility and cross-incompatibility in plums and cherries*. Journal of Genetics, 1925. **15**(3): p. 301-322.
137. Hrubý, K., *Compatibility relations in some sweet cherry cultivars*. Biologia Plantarum, 1962. **4**(1): p. 54-60.
138. Crane, M. and D. Lewis, *Genetical studies in pears*. Journal of Genetics, 1942. **43**(1): p. 31-43.
139. Tammissola, J. and A. Rynänen, *Incompatibility in Rubus arcticus L.* Hereditas, 1970. **66**(2): p. 269-277.
140. Crane, M.B. and W.J.C. Lawrence, *Genetical and cytological aspects of incompatibility and sterility in cultivated fruits*. Journal of Pomology and Horticultural Science, 1929. **7**: p. 276-301.
141. Li, S.J., *Self-incompatibility in 'Matou' wentan (Citrus grandis (L.) Osb.)*. HortScience, 1980. **15**(3): p. 298-300.
142. Soost, R., *Self-incompatibility in Citrus grandis (Linn.) Osbeck*. Proceedings of the American Society of Horticultural Sciences, 1964. **84**: p. 137-140.
143. Rabe, A.J. and D.E. Soltis, *Pollen tube growth and self-incompatibility in Heuchera micrantha var. diversifolia (Saxifragaceae)*. International Journal of Plant Sciences, 1999. **160**(6): p. 1157-1162.
144. Shore, J.S., M.M. Arbo, and A. Fernández, *Breeding system variation, genetics and evolution in the Turneraceae*. New Phytologist, 2006. **171**(3): p. 539-551.
145. Oliveira, P. and P. Gibbs, *Pollination biology and breeding systems of six Vochysia species (Vochysiaceae) in Central Brazil*. Journal of Tropical Ecology, 1994. **10**(04): p. 509-522.
146. Barbosa, A.A.A., *Aspectos da ecologia reprodutiva de três espécies de Qualea (Vochysiaceae) num cerrado de Brasília.*, in Departamento de Biología Vegetal 1983, Universidade do Brasília: Brasília. p. 104.

APPENDIX S2

Families of Angiosperms presenting stigmatic SI inhibition, phylogenetic information (order, phylogenetic group to which they belong), number of species (retrieved from APG II website; Stevens, 2010), age of divergence from Wikström *et al.*, (2001; ‘Wik’), Davies *et al.*, (2004; ‘Dav’) and exponential and log-normal Bell *et al.*, (2010; ‘EBe’ and ‘LBe’, respectively) calibrations. Estimated DR Kendall–Moran estimator:  $\ln(n)/t$ ;  $n$  = number of species,  $t$  = divergence time. Information regarding the number of species in which breeding system (sample size) has been assessed and genetic control basis are presented in the last two columns.

| Family          | Order            | Phylogenetic group | No. of species | Divergence age |       |     |     | Diversification rate |       |       |       | Sample size | Genetic control |
|-----------------|------------------|--------------------|----------------|----------------|-------|-----|-----|----------------------|-------|-------|-------|-------------|-----------------|
|                 |                  |                    |                | Wik            | Dav   | EBe | LBe | Wik                  | Dav   | EBe   | LBe   |             |                 |
| Alismataceae    | Alismatales      | Monocots           | 81             | 65             | 97.5  |     |     | 0.029                | 0.020 |       |       | 19          | unclass.        |
| Asteraceae      | Asterales        | Asterids           | 23600          | 44             | 42.3  | 44  | 40  | 0.099                | 0.100 | 0.099 | 0.109 | 624         | SSI, SSI-GSI    |
| Brassicaceae    | Brassicales      | Rosids             | 3710           | 22             | 50.5  | 31  | 33  | 0.162                | 0.070 | 0.115 | 0.108 | 284         | SSI             |
| Burseraceae     | Sapindales       | Rosids             | 550            | 47             | 42.9  | 50  | 64  | 0.058                | 0.060 | 0.055 | 0.043 | 1           | unclass.        |
| Caryophyllaceae | Caryophyllales   | Core eudicots      | 2200           | 38             | 40.5  | 55  | 59  | 0.088                | 0.080 | 0.061 | 0.057 | 99          | SSI-GSI         |
| Commelinaceae   | Commelinales     | Commelinids        | 652            | 62             | 66.0  | 61  | 66  | 0.045                | 0.040 | 0.046 | 0.043 | 86          | GSI1            |
| Convolvulaceae  | Solanales        | Asterids           | 1601           | 65             | 61.9  | 59  | 62  | 0.049                | 0.050 | 0.054 | 0.052 | 91          | SSI             |
| Euphorbiaceae   | Malpighiales     | Rosids             | 5970           | 39             | 57.4  | 83  | 85  | 0.097                | 0.070 | 0.045 | 0.044 | 53          | unclass.        |
| Melanthiaceae   | Liliales         | Monocots           | 170            | 86             | 89.5  | 83  | 96  | 0.026                | 0.020 | 0.027 | 0.023 | 19          | unclass.        |
| Papaveraceae    | Ranunculales     | Eudicots           | 760            | 126            | 123.9 | 100 | 108 | 0.023                | 0.020 | 0.029 | 0.027 | 26          | GSI1            |
| Poaceae         | Poales           | Commelinids        | 10035          | 34             | 41.0  | 58  | 65  | 0.118                | 0.100 | 0.069 | 0.062 | 303         | GSI2            |
| Ranunculaceae   | Ranunculales     | Eudicots           | 2525           | 87             | 87.3  | 67  | 72  | 0.039                | 0.040 | 0.051 | 0.047 | 95          | GSI2            |
| Saururaceae     | Piperales        | Magnoliids         | 6              | 90             | 80.5  | 67  | 78  | 0.009                | 0.010 | 0.012 | 0.010 | 1           | unclass.        |
| Trimeniaceae    | Austrobaileyales | ANITA              | 6              | 93             | 135.4 |     |     | 0.008                | 0.010 |       |       | 1           | unclass.        |

GSI1 = gametohytic control, one locus; GSI2 = gametophytic, more than 1 locus; SSI = sporophytic control; SSI-GSI = sporophytic and gametophytic control; unclass. = unclassified.

Families of Angiosperms presenting stylar SI inhibition, phylogenetic information (order, phylogenetic group to which they belong), number of species (retrieved from APG II website; Stevens, 2010), age of divergence from Wikström *et al.*, (2001; ‘Wik’), Davies *et al.*, (2004; ‘Dav’) and exponential and log-normal Bell *et al.*, (2010; ‘EBe’ and ‘LBe’, respectively) calibrations. Estimated DR Kendall–Moran estimator:  $\ln(n)/t$ ;  $n$  = number of species,  $t$  = divergence time. Information regarding the number of species in which breeding system (sample size) has been assessed and genetic control basis are presented in the last two columns.

| Family         | Order          | Phylogenetic group | No. of species | Divergence age |      |     |     | Diversification rate |       |       |       | Sample size | Genetic control |
|----------------|----------------|--------------------|----------------|----------------|------|-----|-----|----------------------|-------|-------|-------|-------------|-----------------|
|                |                |                    |                | Wik            | Dav  | EBe | LBe | Wik                  | Dav   | EBe   | LBe   |             |                 |
| Amaranthaceae  | Caryophyllales | Core eudicots      | 2275           | 26             | 39.5 | 55  | 59  | 0.129                | 0.090 | 0.061 | 0.057 | 28          | GSI2            |
| Bromeliaceae   | Poales         | Commelinids        | 1400           | 69             | 74.4 | 85  | 93  | 0.046                | 0.040 | 0.037 | 0.034 | 21          | GSI1            |
| Butomaceae     | Alismatales    | Monocots           | 1              | 65             | 70.2 |     |     | 0.000                | 0.000 |       |       | 2           | unclass.        |
| Cactaceae      | Caryophyllales | Core eudicots      | 1500           | 18             | 28.1 | 21  | 22  | 0.176                | 0.110 | 0.151 | 0.144 | 109         | GSI1            |
| Campanulaceae  | Asterales      | Asterids           | 2300           | 75             | 64.8 | 74  | 79  | 0.045                | 0.050 | 0.045 | 0.043 | 51          | GSI1            |
| Cistaceae      | Malvales       | Rosids             | 175            | 36             | 67.5 | 35  | 38  | 0.062                | 0.030 | 0.064 | 0.059 | 13          | unclass.        |
| Cornaceae      | Cornales       | Asterids           | 85             | 91             | 96.3 | 87  | 87  | 0.021                | 0.020 | 0.022 | 0.022 | 3           | GSI1            |
| Hydrangeaceae  | Cornales       | Asterids           | 190            | 62             | 78.4 | 49  | 50  | 0.037                | 0.030 | 0.047 | 0.046 | 14          | unclass.        |
| Myrsinaceae    | Ericales       | Asterids           | 1435           | 31             | 36.7 | 57  | 61  | 0.102                | 0.090 | 0.055 | 0.052 | 21          | GSI1            |
| Plantaginaceae | Lamiales       | Asterids           | 1700           | 57             | 57.1 | 61  | 64  | 0.057                | 0.060 | 0.053 | 0.050 | 121         | GSI1            |
| Rosaceae       | Rosales        | Rosids             | 2830           | 76             | 73.0 | 82  | 85  | 0.045                | 0.050 | 0.042 | 0.041 | 131         | GSI1            |
| Rutaceae       | Sapindales     | Rosids             | 1815           | 45             | 53.4 | 53  | 54  | 0.072                | 0.060 | 0.061 | 0.060 | 5           | GSI1            |
| Sapotaceae     | Ericales       | Asterids           | 1100           | 59             | 93.1 | 74  | 77  | 0.052                | 0.030 | 0.041 | 0.039 | 1           | unclass.        |
| Strelitziaceae | Zingiberales   | Commelinids        | 7              | 29             | 65.8 | 40  | 42  | 0.029                | 0.010 | 0.021 | 0.020 | 3           | unclass.        |
| Theaceae       | Ericales       | Asterids           | 327.5          | 59             | 82.2 | 74  | 77  | 0.043                | 0.030 | 0.034 | 0.033 | 4           | GSI1            |
| Verbenaceae    | Lamiales       | Asterids           | 1175           | 53             | 39.7 | 25  | 25  | 0.058                | 0.080 | 0.123 | 0.123 | 13          | unclass.        |

GSI1 = gametohytic control, one locus; GSI2 = gametophytic, more than 1 locus; SSI = sporophytic control; SSI-GSI = sporophytic and gametophytic control; unclass. = unclassified.

Families of Angiosperms presenting ovarian SI inhibition, phylogenetic information (order, phylogenetic group to which they belong), number of species (retrieved from APG II website; Stevens, 2010), age of divergence from Wikström *et al.*, (2001; ‘Wik’), Davies *et al.*, (2004; ‘Dav’) and exponential and log-normal Bell *et al.*, (2010; ‘EBe’ and ‘LBe’, respectively) calibrations. Estimated DR Kendall–Moran estimator:  $\ln(n)/t$ ;  $n$  = number of species,  $t$  = divergence time. Information regarding the number of species in which breeding system (sample size) has been assessed and genetic control basis are presented in the last two columns.

| Family            | Order        | Phylogenetic group | No. of species | Divergence age |       |     |     | Diversification rate |       |       |       | Sample size | Genetic control |
|-------------------|--------------|--------------------|----------------|----------------|-------|-----|-----|----------------------|-------|-------|-------|-------------|-----------------|
|                   |              |                    |                | Wik            | Dav   | EBe | LBe | Wik                  | Dav   | EBe   | LBe   |             |                 |
| Annonaceae        | Magnoliales  | Magnoliids         | 2220           | 31             | 78.9  | 50  | 55  | 0.108                | 0.040 | 0.067 | 0.061 | 29          | unclass.        |
| Apocynaceae       | Gentianales  | Asterids           | 4555           | 53             | 67.1  | 50  | 53  | 0.069                | 0.050 | 0.073 | 0.069 | 28          | SSI-GSI         |
| Argophyllaceae    | Asterales    | Asterids           | 17             | 62             | 55.0  | 49  | 53  | 0.020                | 0.020 | 0.025 | 0.023 | 1           | unclass.        |
| Bixaceae          | Malvales     | Rosids             | 21             | 58             | 73.9  | 68  | 71  | 0.023                | 0.020 | 0.019 | 0.019 | 1           | unclass.        |
| Capparaceae       | Brassicales  | Rosids             | 480            | 28             | 50.5  | 41  | 43  | 0.096                | 0.050 | 0.065 | 0.062 | 8           | unclass.        |
| Chrysobalanaceae  | Malpighiales | Rosids             | 460            | 50             | 63.0  | 59  | 60  | 0.053                | 0.040 | 0.045 | 0.044 | 5           | unclass.        |
| Clusiaceae        | Malpighiales | Rosids             | 1050           | 54             | 58.9  | 61  | 45  | 0.056                | 0.050 | 0.050 | 0.067 | 6           | unclass.        |
| Hemerocallidaceae | Asparagales  | Monocots           | 85             | 93             | 52.6  |     |     | 0.021                | 0.040 |       |       | 10          | unclass.        |
| Hyacinthaceae     | Asparagales  | Monocots           | 770            | 45             | 46.7  | 40  | 45  | 0.064                | 0.060 | 0.072 | 0.064 | 17          | unclass.        |
| Malpighiaceae     | Malpighiales | Rosids             | 1250           | 68             | 73.5  | 83  | 85  | 0.046                | 0.040 | 0.037 | 0.036 | 28          | unclass.        |
| Paeoniaceae       | Saxifragales | Rosids             | 33             | 88             | 101.6 | 87  | 89  | 0.017                | 0.010 | 0.017 | 0.017 | 7           | unclass.        |
| Styracaceae       | Ericales     | Asterids           | 160            | 55             | 60.8  | 51  | 54  | 0.040                | 0.040 | 0.043 | 0.041 | 3           | unclass.        |
| Velloziaceae      | Pandanales   | Monocots           | 240            | 74             | 92.6  | 72  | 82  | 0.032                | 0.030 | 0.033 | 0.029 | 4           | unclass.        |
| Winteraceae       | Canellales   | Magnoliids         | 75             | 99             | 106.8 | 77  | 80  | 0.019                | 0.020 | 0.024 | 0.023 | 15          | unclass.        |

GSI1 = gametohytic control, one locus; GSI2 = gametophytic, more than 1 locus; SSI = sporophytic control; SSI-GSI = sporophytic and gametophytic control; unclass. = unclassified.

Families of Angiosperms presenting various SI inhibition sites (polymorphic), phylogenetic information (order, phylogenetic group to which they belong), number of species (retrieved from APG II website; Stevens, 2010), age of divergence from Wikström *et al.*, (2001; ‘Wik’), Davies *et al.*, (2004; ‘Dav’) and exponential and log-normal Bell *et al.*, (2010; ‘EBe’ and ‘LBe’, respectively) calibrations. Estimated DR Kendall–Moran estimator:  $\ln(n)/t$ ;  $n$  = number of species,  $t$  = divergence time. Information regarding the number of species in which breeding system (sample size) has been assessed and genetic control basis are presented in the last two columns.

| Family           | Order          | Phylogenetic group | No. of species | Divergence age |      |     |     | Diversification rate |       |       |       |
|------------------|----------------|--------------------|----------------|----------------|------|-----|-----|----------------------|-------|-------|-------|
|                  |                |                    |                | Wik            | Dav  | EBe | LBe | Wik                  | Dav   | EBe   | LBe   |
| Amaryllidaceae   | Asparagales    | Monocots           | 800            | 55             | 39.0 | 46  | 50  | 0.053                | 0.070 | 0.063 | 0.058 |
| Betulaceae       | Fagales        | Rosids             | 110            | 36             | 33.2 | 27  | 29  | 0.057                | 0.060 | 0.076 | 0.070 |
| Boraginaceae     | Boraginales    | Asterids           | 2740           | 77             | 85.5 | 72  | 83  | 0.045                | 0.040 | 0.048 | 0.041 |
| Dipterocarpaceae | Malvales       | Rosids             | 680            | 28             | 67.5 | 42  | 46  | 0.101                | 0.040 | 0.067 | 0.062 |
| Droseraceae      | Caryophyllales | Core eudicots      | 115            | 62             | 66.5 | 65  | 70  | 0.033                | 0.030 | 0.032 | 0.029 |
| Fabaceae         | Fabales        | Rosids             | 19400          | 72             | 63.8 | 71  | 73  | 0.060                | 0.070 | 0.060 | 0.059 |
| Fagaceae         | Fagales        | Rosids             | 670            | 61             | 63.8 | 52  | 55  | 0.046                | 0.040 | 0.054 | 0.051 |
| Iridaceae        | Asparagales    | Monocots           | 1870           | 30             | 78.1 | 72  | 81  | 0.109                | 0.040 | 0.045 | 0.040 |
| Lamiaceae        | Lamiales       | Asterids           | 7173           | 42             | 39.7 | 48  | 50  | 0.092                | 0.100 | 0.080 | 0.077 |
| Liliaceae        | Liliales       | Monocots           | 635            | 64             | 63.3 | 63  | 92  | 0.044                | 0.040 | 0.044 | 0.030 |
| Lythraceae       | Myrtales       | Rosids             | 620            | 63             | 64.9 | 63  | 67  | 0.044                | 0.040 | 0.044 | 0.042 |
| Malvaceae        | Malvales       | Rosids             | 4225           | 57             | 65.8 | 66  | 67  | 0.064                | 0.060 | 0.055 | 0.054 |
| Nyctaginaceae    | Caryophyllales | Core eudicots      | 395            | 26             | 30.6 | 36  | 38  | 0.100                | 0.080 | 0.072 | 0.068 |
| Onagraceae       | Myrtales       | Rosids             | 650            | 63             | 64.9 | 63  | 67  | 0.045                | 0.040 | 0.045 | 0.042 |
| Orchidaceae      | Asparagales    | Monocots           | 20250          | 69             | 96.5 | 92  | 103 | 0.062                | 0.040 | 0.047 | 0.042 |

|                |              |          |      |     |       |    |    |       |       |       |       |
|----------------|--------------|----------|------|-----|-------|----|----|-------|-------|-------|-------|
| Passifloraceae | Malpighiales | Rosids   | 670  | 35  | 76.4  | 39 | 43 | 0.081 | 0.040 | 0.072 | 0.066 |
| Polemoniaceae  | Ericales     | Asterids | 350  | 72  | 75.7  | 61 | 64 | 0.035 | 0.030 | 0.042 | 0.040 |
| Proteaceae     | Proteales    | Eudicots | 1600 | 108 | 126.1 | 98 | 99 | 0.030 | 0.030 | 0.033 | 0.032 |
| Rhamnaceae     | Rosales      | Rosids   | 925  | 64  | 64.0  | 69 | 71 | 0.046 | 0.050 | 0.043 | 0.042 |
| Saxifragaceae  | Saxifragales | Rosids   | 630  | 76  | 70.9  | 77 | 76 | 0.037 | 0.040 | 0.036 | 0.037 |
| Solanaceae     | Solanales    | Asterids | 2460 | 65  | 61.9  | 59 | 62 | 0.052 | 0.050 | 0.057 | 0.055 |
| Vochysiaceae   | Myrtales     | Rosids   | 210  | 73  | 78.0  | 62 | 69 | 0.032 | 0.030 | 0.037 | 0.034 |

---

Families of Angiosperms presenting various SI inhibition sites (polymorphic), and information on the SI inhibition sites, number of species in which breeding system has been assessed (Sample size) and genetic control basis.

| <b>Family</b>    | <b>Sample size</b> | <b>SI inhibition site</b>                                                | <b>Genetic control</b> |
|------------------|--------------------|--------------------------------------------------------------------------|------------------------|
| Amaryllidaceae   | 26                 | Ovarian, Heterostyly + Ovarian                                           | unclass.               |
| Betulaceae       | 9                  | Stigmatic , Stylar                                                       | SSI                    |
| Boraginaceae     | 70                 | Ovarian, Heterostyly + Ovarian                                           | unclass.               |
| Dipterocarpaceae | 7                  | Stigmatic, post-fertilization SS                                         | unclass.               |
| Droseraceae      | 25                 | Stigmatic , Stylar, Ovarian                                              | unclass.               |
| Fabaceae         | 370                | Stylar, Ovarian, Post-fertilization SS, Heterostyly                      | GSI1, GSI2             |
| Fagaceae         | 10                 | Stylar, Ovarian                                                          | GSI1                   |
| Iridaceae        | 145                | Ovarian, Heterostyly + Ovarian                                           | unclass.               |
| Lamiaceae        | 54                 | Ovarian, Heterostyly                                                     | unclass.               |
| Liliaceae        | 64                 | Stigmatic, Ovarian, Post-fertilization SS                                | GSI2                   |
| Lythraceae       | 14                 | Stigmatic , Stylar, Heterostyly + Stigmatic, Heterostyly + Stylar        | unclass.               |
| Malvaceae        | 133                | Stigmatic, Stylar, Ovarian, Post-fertilization SS, Heterostyly + Ovarian | GSI1,SSI-GSI           |
| Nyctaginaceae    | 13                 | Stigmatic, Heterostyly                                                   | unclass.               |
| Onagraceae       | 104                | Stigmatic, Stylar, Ovarian, Post-fertilization SS                        | unclass.               |
| Orchidaceae      | 162                | Stigmatic, Stylar, Ovarian, Post-fertilization SS                        | unclass.               |
| Passifloraceae   | 15                 | Stigmatic, Stylar                                                        | SSI-GSI                |
| Polemoniaceae    | 99                 | Stigmatic, Ovarian                                                       | GSI1,SSI               |



|               |     |                      |            |
|---------------|-----|----------------------|------------|
| Proteaceae    | 26  | Stylar, Ovarian      | unclass.   |
| Rhamnaceae    | 14  | Stigmatic, Stylar    | unclass.   |
| Saxifragaceae | 27  | Ovarian, Heterostyly | unclass.   |
| Solanaceae    | 227 | Stylar, Ovarian      | GSI1, GSI2 |
| Vochysiaceae  | 12  | Stylar, Ovarian      | unclass.   |

---

GSI1 = gametohytic control, one locus; GSI2 = gametophytic, more than 1 locus; SSI = sporophytic control; SSI-GSI = sporophytic and gametophytic control; unclass. = unclassified.

Families of Angiosperms presenting post-fertilization SS, phylogenetic information (order, phylogenetic group to which they belong), number of species (retrieved from APG II website; Stevens, 2010), age of divergence from Wikström *et al.*, (2001; ‘Wik’), Davies *et al.*, (2004; ‘Dav’) and exponential and log-normal Bell *et al.*, (2010; ‘EBe’ and ‘LBe’, respectively) calibrations. Estimated DR Kendall–Moran estimator:  $\ln(n)/t$ ;  $n$  = number of species,  $t$  = divergence time. Information regarding the number of species in which breeding system (sample size) has been assessed and genetic control basis are presented in the last two columns.

| Family          | Order        | Phylogenetic group | No. of species | Divergence age |      |     |     | Diversification rate |       |       |       | Sample size | Genetic control |
|-----------------|--------------|--------------------|----------------|----------------|------|-----|-----|----------------------|-------|-------|-------|-------------|-----------------|
|                 |              |                    |                | Wik            | Dav  | EBe | LBe | Wik                  | Dav   | EBe   | LBe   |             |                 |
| Anacardiaceae   | Sapindales   | Rosids             | 985            | 47             | 42.9 | 50  | 64  | 0.064                | 0.070 | 0.060 | 0.047 | 6           | unclass.        |
| Asphodelaceae   | Asparagales  | Monocots           | 785            | 52             | 52.5 | 47  | 52  | 0.056                | 0.060 | 0.062 | 0.056 | 26          | unclass.        |
| Bignoniaceae    | Lamiales     | Asterids           | 800            | 52             | 45.3 | 25  | 25  | 0.056                | 0.060 | 0.116 | 0.116 | 41          | unclass.        |
| Grossulariaceae | Saxifragales | Rosids             | 150            | 81             | 70.9 | 89  | 89  | 0.027                | 0.030 | 0.024 | 0.024 | 15          | unclass.        |
| Myrtaceae       | Myrtales     | Rosids             | 4620           | 67             | 80.9 | 62  | 69  | 0.055                | 0.050 | 0.059 | 0.053 | 72          | unclass.        |

GSI1 = gametohytic control, one locus; GSI2 = gametophytic, more than 1 locus; SSI = sporophytic control; SSI-GSI = sporophytic and gametophytic control; unclass. = unclassified.

Families of Angiosperms presenting heterostyly, phylogenetic information (order, phylogenetic group to which they belong), number of species (retrieved from APG II website; Stevens, 2010), age of divergence from Wikström *et al.*, (2001; ‘Wik’), Davies *et al.*, (2004; ‘Dav’) and exponential and log-normal Bell *et al.*, (2010; ‘EBe’ and ‘LBe’, respectively) calibrations. Estimated DR Kendall–Moran estimator:  $\ln(n)/t$ ;  $n$  = number of species,  $t$  = divergence time. Information regarding the number of species in which breeding system (sample size) has been assessed and genetic control basis are presented in the last two columns.

| Family         | Order          | Phylogenetic group | No. of species | Divergence age |       |     |     | Diversification rate |       |       |       | Sample size |
|----------------|----------------|--------------------|----------------|----------------|-------|-----|-----|----------------------|-------|-------|-------|-------------|
|                |                |                    |                | Wik            | Dav   | EBe | LBe | Wik                  | Dav   | EBe   | LBe   |             |
| Acanthaceae    | Lamiales       | Asterids           | 3500           | 50             | 42.6  | 48  | 51  | 0.071                | 0.080 | 0.074 | 0.069 | 43          |
| Connaraceae    | Oxalidales     | Rosids             | 180            | 71             | 63.2  |     |     | 0.032                | 0.040 |       |       | 1           |
| Ericaceae      | Ericales       | Asterids           | 3995           | 56             | 76.8  | 40  | 44  | 0.064                | 0.050 | 0.090 | 0.082 | 61          |
| Gentianaceae   | Gentianales    | Asterids           | 1655           | 52             | 61.5  | 50  | 53  | 0.062                | 0.050 | 0.064 | 0.061 | 43          |
| Hypericaceae   | Malpighiales   | Rosids             | 560            | 36             | 44.1  | 43  | 42  | 0.076                | 0.060 | 0.064 | 0.065 | 6           |
| Menyanthaceae  | Asterales      | Asterids           | 40             | 65             | 57.3  | 58  | 63  | 0.025                | 0.030 | 0.028 | 0.025 | 14          |
| Olacaceae      | Santalales     | Core eudicots      | 103            | 88             | 114.5 | 91  | 99  | 0.023                | 0.020 | 0.022 | 0.020 | 2           |
| Oxalidaceae    | Oxalidales     | Rosids             | 770            | 71             | 63.2  | 59  | 64  | 0.041                | 0.050 | 0.049 | 0.045 | 7           |
| Plumbaginaceae | Caryophyllales | Core eudicots      | 836            | 42             | 59.3  | 58  | 60  | 0.070                | 0.050 | 0.050 | 0.049 | 169         |
| Polygonaceae   | Caryophyllales | Core eudicots      | 1100           | 30             | 59.3  | 58  | 60  | 0.101                | 0.050 | 0.052 | 0.051 | 29          |
| Santalaceae    | Santalales     | Core eudicots      | 990            | 65             | 114.5 | 82  | 89  | 0.046                | 0.030 | 0.037 | 0.034 | 2           |
| Zingiberaceae  | Zingiberales   | Commelinids        | 1188           | 43             | 66.5  | 43  | 45  | 0.072                | 0.050 | 0.072 | 0.068 | 15          |

Families of Angiosperms presenting heterostyly and SI inhibition, phylogenetic information (order, phylogenetic group to which they belong), number of species (retrieved from APG II website; Stevens, 2010), age of divergence from Wikström *et al.*, (2001; ‘Wik’), Davies *et al.*, (2004; ‘Dav’) and exponential and log-normal Bell *et al.*, (2010; ‘EBe’ and ‘LBe’, respectively) calibrations. Estimated DR Kendall–Moran estimator:  $\ln(n)/t$ ;  $n$  = number of species,  $t$  = divergence time. Information regarding the number of species in which breeding system (sample size) has been assessed and SI inhibition site are presented in the last two columns.

| Family          | Order        | Phylogenetic group | No. of species | Divergence age |      |     |     | Diversification rate |       |       |       | Sample size | SI inhibition site |
|-----------------|--------------|--------------------|----------------|----------------|------|-----|-----|----------------------|-------|-------|-------|-------------|--------------------|
|                 |              |                    |                | Wik            | Dav  | EBe | LBe | Wik                  | Dav   | EBe   | LBe   |             |                    |
| Erythroxylaceae | Malpighiales | Rosids             | 240            | 54             | 76.4 | 60  | 63  | 0.044                | 0.030 | 0.040 | 0.038 | 9           | Stylar             |
| Linaceae        | Malpighiales | Rosids             | 300            | 71             | 76.7 | 71  | 73  | 0.035                | 0.030 | 0.035 | 0.034 | 16          | Stigmatic          |
| Oleaceae        | Lamiales     | Asterids           | 615            | 63             | 58.9 | 69  | 74  | 0.044                | 0.050 | 0.040 | 0.038 | 9           | Stylar             |
| Pontederiaceae  | Commelinales | Commelinids        | 33             | 62             | 66.0 | 61  | 66  | 0.024                | 0.020 | 0.025 | 0.023 | 25          | Ovarian            |
| Primulaceae     | Ericales     | Asterids           | 900            | 31             | 36.7 | 40  | 44  | 0.095                | 0.080 | 0.074 | 0.067 | 35          | Stigmatic, Stylar  |
| Rubiaceae       | Gentianales  | Asterids           | 10000          | 63             | 76.5 | 65  | 69  | 0.063                | 0.050 | 0.062 | 0.058 | 79          | Stigmatic, Stylar  |
| Turneraceae     | Malpighiales | Rosids             | 110            | 33             | 75.4 | 43  | 47  | 0.062                | 0.030 | 0.047 | 0.043 | 50          | Stigmatic, Stylar  |

Families of Angiosperms presenting species with self-sterility, phylogenetic information (order, phylogenetic group to which they belong), number of species (retrieved from APG II website; Stevens, 2010), age of divergence from Wikström *et al.*, (2001; ‘Wik’), Davies *et al.*, (2004; ‘Dav’) and exponential and log-normal Bell *et al.*, (2010; ‘EBe’ and ‘LBe’, respectively) calibrations. Estimated DR Kendall–Moran estimator:  $\ln(n)/t$ ;  $n$  = number of species,  $t$  = divergence time. Information regarding the number of species in which breeding system (sample size) has been assessed is presented in the last column.

| Family            | Order            | Phylogenetic group | No. of species | Divergence age |       |     |     | Diversification rate |       |       |       | Sample size |
|-------------------|------------------|--------------------|----------------|----------------|-------|-----|-----|----------------------|-------|-------|-------|-------------|
|                   |                  |                    |                | Wik            | Dav   | EBe | LBe | Wik                  | Dav   | EBe   | LBe   |             |
| Adoxaceae         | Dipsacales       | Asterids           | 200            | 78             | 86.3  | 57  | 60  | 0.030                | 0.030 | 0.040 | 0.038 | 6           |
| Agavaceae         | Asparagales      | Monocots           | 637            | 51             | 46.1  | 33  | 40  | 0.055                | 0.060 | 0.085 | 0.070 | 39          |
| Aizoaceae         | Caryophyllales   | Core eudicots      | 2020           | 20             | 30.6  | 19  | 21  | 0.165                | 0.110 | 0.174 | 0.157 | 5           |
| Alliaceae         | Asparagales      | Monocots           | 795            | 45             | 51.4  | 46  | 50  | 0.064                | 0.060 | 0.063 | 0.058 | 8           |
| Alstroemeriaceae  | Liliales         | Monocots           | 165            | 56             | 63.4  | 59  | 62  | 0.040                | 0.030 | 0.038 | 0.036 | 3           |
| Araceae           | Alismatales      | Monocots           | 4025           | 111            | 122.3 | 107 | 122 | 0.032                | 0.030 | 0.034 | 0.030 | 22          |
| Araliaceae        | Apiales          | Asterids           | 1450           | 43             | 69.4  | 35  | 38  | 0.074                | 0.050 | 0.090 | 0.083 | 4           |
| Arecaceae         | Arecales         | Commelinids        | 2000           | 64             | 101.0 | 96  | 103 | 0.052                | 0.030 | 0.034 | 0.032 | 10          |
| Aristolochiaceae  | Piperales        | Magnoliids         | 480            | 111            | 120.2 | 104 | 119 | 0.024                | 0.020 | 0.026 | 0.023 | 17          |
| Austrobaileyaceae | Austrobaileyales | ANITA              | 2              | 133            | 140.8 | 114 | 122 | 0.002                | 0.000 | 0.003 | 0.002 | 2           |
| Berberidaceae     | Ranunculales     | Eudicots           | 701            | 87             | 87.3  | 67  | 72  | 0.033                | 0.030 | 0.042 | 0.040 | 12          |
| Blandfordiaceae   | Asparagales      | Monocots           | 4              | 75             | 74.8  | 66  | 72  | 0.008                | 0.010 | 0.009 | 0.008 | 3           |
| Byblidaceae       | Lamiales         | Asterids           | 6              | 49             | 52.1  | 61  | 64  | 0.016                | 0.010 | 0.013 | 0.012 | 2           |
| Calyceraceae      | Asterales        | Asterids           | 60             | 40             | 42.3  | 37  | 47  | 0.044                | 0.040 | 0.048 | 0.038 | 2           |
| Caprifoliaceae    | Dipsacales       | Asterids           | 220            | 34             | 86.3  | 24  | 22  | 0.069                | 0.030 | 0.098 | 0.106 | 2           |
| Celastraceae      | Celastrales      | Rosids             | 1300           | 58             | 42.0  | 71  | 76  | 0.054                | 0.070 | 0.044 | 0.041 | 1           |

|                 |                        |               |      |     |       |     |     |       |       |       |       |    |
|-----------------|------------------------|---------------|------|-----|-------|-----|-----|-------|-------|-------|-------|----|
| Chloranthaceae  | Chlorantales           | ANITA         | 75   | 141 | 143.8 | 127 | 140 | 0.013 | 0.010 | 0.015 | 0.013 | 7  |
| Colchicaceae    | Liliales               | Monocots      | 225  | 56  | 53.3  | 59  | 62  | 0.042 | 0.040 | 0.040 | 0.038 | 23 |
| Combretaceae    | Myrtales               | Rosids        | 500  | 65  | 74.0  | 76  | 83  | 0.042 | 0.040 | 0.036 | 0.033 | 4  |
| Crassulaceae    | Saxifragales           | Rosids        | 1370 | 77  | 81.7  | 77  | 80  | 0.041 | 0.040 | 0.041 | 0.039 | 17 |
| Cunoniaceae     | Oxalidales             | Rosids        | 280  | 64  | 53.2  | 46  | 50  | 0.038 | 0.050 | 0.053 | 0.049 | 1  |
| Cyclanthaceae   | Pandanales             | Monocots      | 225  | 67  | 67.2  | 47  | 52  | 0.035 | 0.040 | 0.050 | 0.045 | 4  |
| Cyperaceae      | Poales                 | Commelinids   | 4350 | 39  | 44.0  | 79  | 87  | 0.093 | 0.080 | 0.046 | 0.042 | 28 |
| Diervillaceae   | Dipsacales             | Asterids      | 16   | 37  | 86.3  |     |     | 0.033 | 0.010 |       |       | 1  |
| Dipsacaceae     | Dipsacales             | Asterids      | 290  | 34  | 85.3  | 10  | 11  | 0.072 | 0.030 | 0.246 | 0.224 | 6  |
| Elaeocarpaceae  | Oxalidales             | Rosids        | 605  | 57  | 53.2  | 46  | 50  | 0.049 | 0.050 | 0.060 | 0.056 | 3  |
| Escalloniaceae  | Unplaced, near Apiales | Asterids      | 68   | 74  | 79.1  | 77  | 84  | 0.025 | 0.020 | 0.024 | 0.022 | 2  |
| Eupomatiaceae   | Magnoliales            | Magnoliids    | 4    | 86  | 78.9  | 50  | 55  | 0.007 | 0.010 | 0.012 | 0.011 | 4  |
| Frankeniaceae   | Caryophyllales         | Core eudicots | 90   | 40  | 44.8  | 51  | 52  | 0.049 | 0.040 | 0.038 | 0.038 | 2  |
| Geraniaceae     | Geraniales             | Rosids        | 805  | 79  | 103.9 | 87  | 93  | 0.037 | 0.030 | 0.033 | 0.031 | 35 |
| Goodeniaceae    | Asterales              | Asterids      | 400  | 40  | 42.3  | 37  | 47  | 0.065 | 0.060 | 0.070 | 0.055 | 2  |
| Hamamelidaceae  | Saxifragales           | Rosids        | 82   | 99  | 101.6 | 95  | 103 | 0.019 | 0.020 | 0.020 | 0.019 | 2  |
| Heliconiaceae   | Zingiberales           | Commelinids   | 150  | 53  | 66.5  | 38  | 40  | 0.041 | 0.030 | 0.057 | 0.054 | 18 |
| Hypoxidaceae    | Asparagales            | Monocots      | 155  | 69  | 74.8  | 74  | 81  | 0.032 | 0.030 | 0.030 | 0.027 | 3  |
| Illiciaceae     | Austrobaileyales       | ANITA         | 92   | 93  | 135.4 | 89  | 89  | 0.021 | 0.010 | 0.022 | 0.022 | 2  |
| Juncaginaceae   | Alismatales            | Monocots      | 15   | 90  | 60.7  |     |     | 0.013 | 0.020 |       |       | 2  |
| Lardizabalaceae | Ranunculales           | Eudicots      | 36   | 57  | 105.3 | 81  | 87  | 0.027 | 0.010 | 0.019 | 0.018 | 1  |

|                  |              |               |      |    |       |    |    |       |       |       |       |     |
|------------------|--------------|---------------|------|----|-------|----|----|-------|-------|-------|-------|-----|
| Lauraceae        | Laurales     | Magnoliids    | 2500 | 91 | 99.8  | 45 | 52 | 0.037 | 0.030 | 0.076 | 0.065 | 12  |
| Laxmanniaceae    | Asparagales  | Monocots      | 178  | 75 | 46.9  | 45 | 49 | 0.030 | 0.050 | 0.050 | 0.046 | 3   |
| Lecythidaceae    | Ericales     | Asterids      | 310  | 82 | 90.6  | 74 | 77 | 0.030 | 0.030 | 0.034 | 0.032 | 2   |
| Lentibulariaceae | Lamiales     | Asterids      | 320  | 52 | 52.1  | 51 | 54 | 0.048 | 0.050 | 0.049 | 0.046 | 5   |
| Linnaeaceae      | Dipsacales   | Asterids      | 36   | 37 | 86.3  | 29 | 29 | 0.042 | 0.020 | 0.054 | 0.054 | 1   |
| Loasaceae        | Cornales     | Asterids      | 265  | 82 | 78.4  | 49 | 50 | 0.030 | 0.030 | 0.049 | 0.048 | 1   |
| Loganiaceae      | Gentianales  | Asterids      | 420  | 52 | 61.5  | 57 | 61 | 0.050 | 0.040 | 0.046 | 0.043 | 8   |
| Loranthaceae     | Santalales   | Core eudicots | 950  | 64 | 114.5 |    |    | 0.047 | 0.030 |       |       | 11  |
| Magnoliaceae     | Magnoliales  | Magnoliids    | 227  | 93 | 94.3  | 50 | 56 | 0.025 | 0.020 | 0.047 | 0.042 | 22  |
| Marantaceae      | Zingiberales | Commelinids   | 550  | 44 | 66.5  | 40 | 42 | 0.062 | 0.040 | 0.069 | 0.065 | 7   |
| Marcgraviaceae   | Ericales     | Asterids      | 130  | 40 | 65.4  | 43 | 46 | 0.053 | 0.030 | 0.049 | 0.046 | 5   |
| Melastomataceae  | Myrtales     | Rosids        | 4570 | 73 | 66.5  | 73 | 75 | 0.050 | 0.060 | 0.050 | 0.049 | 126 |
| Meliaceae        | Sapindales   | Rosids        | 621  | 36 | 49.4  | 50 | 50 | 0.078 | 0.060 | 0.056 | 0.056 | 3   |
| Monimiaceae      | Laurales     | Magnoliids    | 200  | 91 | 99.8  | 45 | 52 | 0.025 | 0.020 | 0.051 | 0.044 | 7   |
| Myricaceae       | Fagales      | Rosids        | 57   | 38 | 51.0  | 29 | 32 | 0.046 | 0.030 | 0.061 | 0.055 | 2   |
| Nothofagaceae    | Fagales      | Rosids        | 35   | 62 | 71.6  |    |    | 0.025 | 0.020 |       |       | 6   |
| Ochnaceae        | Malpighiales | Rosids        | 495  | 35 | 76.7  | 45 | 45 | 0.077 | 0.040 | 0.060 | 0.060 | 2   |
| Orobanchaceae    | Lamiales     | Asterids      | 2061 | 44 | 41.7  | 38 | 48 | 0.075 | 0.080 | 0.087 | 0.069 | 29  |
| Paulowniaceae    | Lamiales     | Asterids      | 1    | 44 | 41.7  | 38 | 48 | 0.000 | 0.000 | 0.000 | 0.000 | 1   |
| Pedaliaceae      | Lamiales     | Asterids      | 70   | 48 | 45.3  | 48 | 51 | 0.038 | 0.040 | 0.038 | 0.036 | 2   |
| Piperaceae       | Piperales    | Magnoliids    | 2015 | 90 | 80.5  | 67 | 78 | 0.037 | 0.040 | 0.049 | 0.042 | 11  |

|                  |                  |               |      |     |       |    |    |       |       |       |       |    |
|------------------|------------------|---------------|------|-----|-------|----|----|-------|-------|-------|-------|----|
| Polygalaceae     | Fabales          | Rosids        | 1045 | 67  | 72.3  | 79 | 83 | 0.045 | 0.040 | 0.038 | 0.036 | 6  |
| Portulacaceae    | Caryophyllales   | Core eudicots | 395  | 18  | 28.1  | 21 | 22 | 0.144 | 0.090 | 0.124 | 0.118 | 9  |
| Resedaceae       | Brassicales      | Rosids        | 75   | 39  | 43.5  | 54 | 57 | 0.048 | 0.040 | 0.035 | 0.033 | 2  |
| Rousseaceae      | Asterales        | Asterids      | 13   | 76  | 77.4  | 77 | 84 | 0.015 | 0.010 | 0.014 | 0.013 | 2  |
| Ruscaceae        | Asparagales      | Monocots      | 475  | 52  | 43.8  |    |    | 0.051 | 0.060 |       |       | 7  |
| Salicaceae       | Malpighiales     | Rosids        | 1010 | 57  | 58.0  | 71 | 73 | 0.053 | 0.050 | 0.042 | 0.041 | 7  |
| Sapindaceae      | Sapindales       | Rosids        | 1580 | 56  | 58.8  | 64 | 51 | 0.057 | 0.050 | 0.050 | 0.063 | 13 |
| Schisandraceae   | Austrobaileyales | ANITA         | 92   | 93  | 135.4 | 89 | 89 | 0.021 | 0.010 | 0.022 | 0.022 | 1  |
| Scrophulariaceae | Lamiales         | Asterids      | 1700 | 57  | 57.1  | 56 | 55 | 0.057 | 0.060 | 0.058 | 0.059 | 56 |
| Staphyleaceae    | Crossosomatales  | Rosids        | 45   | 56  | 42.7  | 34 | 37 | 0.030 | 0.040 | 0.049 | 0.045 | 1  |
| Stylidiaceae     | Asterales        | Asterids      | 157  | 70  | 67.0  | 67 | 73 | 0.031 | 0.030 | 0.033 | 0.030 | 2  |
| Tecophilaeaceae  | Asparagales      | Monocots      | 23   | 75  | 84.8  | 70 | 79 | 0.018 | 0.020 | 0.019 | 0.017 | 5  |
| Valeraniaceae    | Dipsacales       | Asterids      | 315  | 53  | 86.3  | 36 | 37 | 0.047 | 0.030 | 0.069 | 0.068 | 4  |
| Vitaceae         | Vitales          | Rosids        | 850  | 108 | 112.4 | 65 | 48 | 0.027 | 0.030 | 0.045 | 0.061 | 1  |
| Vivianiaceae     | Geraniales       | Rosids        | 6    | 78  | 101.5 | 70 | 77 | 0.010 | 0.010 | 0.011 | 0.010 | 1  |
| Xyridaceae       | Poales           | Commelinids   | 260  | 52  | 65.2  | 71 | 78 | 0.046 | 0.040 | 0.034 | 0.031 | 2  |

---



Families of Angiosperms presenting exclusively species bearing SC, phylogenetic information (order, phylogenetic group to which they belong), number of species (retrieved from APG II website; Stevens, 2010), age of divergence from Wikström *et al.*, (2001; ‘Wik’), Davies *et al.*, (2004; ‘Dav’) and exponential and log-normal Bell *et al.*, (2010; ‘EBe’ and ‘LBe’, respectively) calibrations. Estimated DR Kendall–Moran estimator:  $\ln(n)/t$ ;  $n$  = number of species,  $t$  = divergence time. Information regarding the number of species in which breeding system (sample size) has been assessed is presented in the last column.

| Family           | Order           | Phylogenetic group | No. of species | Divergence age |       |     |     | Diversification rate |       |       |       | Sample size |
|------------------|-----------------|--------------------|----------------|----------------|-------|-----|-----|----------------------|-------|-------|-------|-------------|
|                  |                 |                    |                | Wik            | Dav   | EBe | LBe | Wik                  | Dav   | EBe   | LBe   |             |
| Apiaceae         | Apiales         | Asterids           | 3780           | 42             | 56.9  | 35  | 38  | 0.085                | 0.060 | 0.102 | 0.094 | 41          |
| Aquifoliaceae    | Aquifoliales    | Asterids           | 405            | 52             | 77.0  | 42  | 45  | 0.050                | 0.030 | 0.062 | 0.058 | 1           |
| Asparagaceae     | Asparagales     | Monocots           | 230            | 45             | 43.8  | 45  | 49  | 0.052                | 0.050 | 0.052 | 0.048 | 2           |
| Balanophoraceae  | Santalales      | Core eudicots      | 50             | 112            | 114.5 |     |     | 0.015                | 0.010 |       |       | 1           |
| Balsaminaceae    | Ericales        | Asterids           | 1001           | 46             | 69.8  | 49  | 52  | 0.065                | 0.040 | 0.061 | 0.058 | 5           |
| Begoniaceae      | Cucurbitales    | Rosids             | 1401           | 51             | 48.1  | 46  | 52  | 0.062                | 0.070 | 0.068 | 0.061 | 6           |
| Burmanniaceae    | Dioscoreales    | Monocots           | 95             | 93             | 100.7 | 83  | 92  | 0.021                | 0.020 | 0.024 | 0.021 | 3           |
| Buxaceae         | Buxales         | Eudicots           | 70             | 93             | 124.4 | 98  | 99  | 0.020                | 0.010 | 0.019 | 0.019 | 1           |
| Cabombaceae      | Nymphaeles      | ANITA              | 6              | 60             | 154.3 |     |     | 0.013                | 0.010 |       |       | 1           |
| Calycanthaceae   | Laurales        | Magnoliids         | 11             | 108            | 119.2 | 98  | 98  | 0.010                | 0.010 | 0.011 | 0.011 | 1           |
| Cannaceae        | Zingiberales    | Commelinids        | 19             | 43             | 66.5  | 38  | 40  | 0.030                | 0.020 | 0.034 | 0.032 | 5           |
| Caricaceae       | Brassicales     | Rosids             | 34             | 58             | 66.9  | 64  | 67  | 0.026                | 0.020 | 0.024 | 0.023 | 1           |
| Caryocaraceae    | Malpighiales    | Rosids             | 21             | 60             | 68.4  | 76  | 78  | 0.022                | 0.020 | 0.017 | 0.017 | 1           |
| Casuarinaceae    | Fagales         | Rosids             | 95             | 36             | 33.2  | 27  | 29  | 0.055                | 0.060 | 0.073 | 0.068 | 2           |
| Ceratophyllaceae | Ceratophyllales | Ceratophyllales    | 1.5            | 140            | 143.8 | 136 | 156 | 0.001                | 0.000 | 0.001 | 0.001 | 1           |

|                  |                |               |      |     |       |     |     |       |       |       |       |    |
|------------------|----------------|---------------|------|-----|-------|-----|-----|-------|-------|-------|-------|----|
| Cleomaceae       | Brassicales    | Rosids        | 300  | 23  | 51.5  | 31  | 33  | 0.108 | 0.050 | 0.080 | 0.075 | 1  |
| Coriariaceae     | Cucurbitales   | Rosids        | 5    | 52  | 60.8  | 43  | 49  | 0.013 | 0.010 | 0.016 | 0.014 | 10 |
| Cucurbitaceae    | Cucurbitales   | Rosids        | 845  | 66  | 48.1  | 56  | 62  | 0.044 | 0.060 | 0.052 | 0.047 | 17 |
| Curtisiaceae     | Cornales       | Asterids      | 2    | 90  | 96.3  |     |     | 0.003 | 0.000 |       |       | 1  |
| Cyrillaceae      | Ericales       | Asterids      | 2    | 54  | 76.8  | 44  | 47  | 0.006 | 0.000 | 0.007 | 0.006 | 1  |
| Datisceae        | Cucurbitales   | Rosids        | 2    | 57  | 53.9  | 52  | 58  | 0.005 | 0.010 | 0.006 | 0.005 | 1  |
| Diapensiaceae    | Ericales       | Asterids      | 18   | 55  | 60.8  | 51  | 54  | 0.023 | 0.020 | 0.025 | 0.023 | 1  |
| Dilleniaceae     | Dilleniales    | Eudicots      | 300  | 104 | 114.5 | 111 | 121 | 0.024 | 0.020 | 0.022 | 0.020 | 3  |
| Drosophyllaceae  | Caryophyllales | Core eudicots | 1    | 39  | 64.3  |     |     | 0.000 | 0.000 |       |       | 1  |
| Ebenaceae        | Ericales       | Asterids      | 490  | 75  | 88.4  | 74  | 77  | 0.036 | 0.030 | 0.036 | 0.035 | 1  |
| Emblingiaceae    | Brassicales    | Rosids        | 1    | 38  | 43.5  |     |     | 0.000 | 0.000 |       |       | 1  |
| Eriocaulaceae    | Poales         | Commelinids   | 420  | 48  | 65.2  |     |     | 0.055 | 0.040 |       |       | 2  |
| Gesneriaceae     | Lamiales       | Asterids      | 3200 | 52  | 57.1  | 56  | 55  | 0.067 | 0.060 | 0.063 | 0.064 | 16 |
| Haloragaceae     | Saxifragales   | Rosids        | 145  | 47  | 64.7  | 48  | 51  | 0.046 | 0.030 | 0.045 | 0.042 | 3  |
| Hydrocharitaceae | Alismatales    | Monocots      | 116  | 65  | 70.2  | 68  | 80  | 0.032 | 0.030 | 0.030 | 0.026 | 4  |
| Juglandaceae     | Fagales        | Rosids        | 50   | 38  | 51.0  | 29  | 32  | 0.045 | 0.030 | 0.059 | 0.053 | 5  |
| Juncaceae        | Poales         | Commelinids   | 430  | 39  | 44.0  |     |     | 0.068 | 0.060 |       |       | 12 |
| Lactoridaceae    | Piperales      | Magnoliids    | 1    | 97  | 120.2 |     |     | 0.000 | 0.000 |       |       | 1  |
| Limnanthaceae    | Brassicales    | Rosids        | 8    | 52  | 65.4  | 71  | 73  | 0.017 | 0.010 | 0.013 | 0.012 | 8  |
| Malesherbiaceae  | Malpighiales   | Rosids        | 24   | 33  | 75.4  | 39  | 43  | 0.042 | 0.020 | 0.035 | 0.032 | 1  |

|                  |                |               |      |     |       |     |     |       |       |       |       |    |
|------------------|----------------|---------------|------|-----|-------|-----|-----|-------|-------|-------|-------|----|
| Mayacaceae       | Poales         | Commelinids   | 7    | 69  | 74.4  |     |     | 0.012 | 0.010 |       |       | 1  |
| Molluginaceae    | Caryophyllales | Core eudicots | 87   | 34  | 28.1  | 51  | 54  | 0.057 | 0.070 | 0.038 | 0.036 | 1  |
| Moraceae         | Rosales        | Rosids        | 1100 | 46  | 25.2  | 50  | 51  | 0.066 | 0.120 | 0.061 | 0.060 | 2  |
| Moringaceae      | Brassicales    | Rosids        | 12   | 58  | 66.9  | 64  | 67  | 0.019 | 0.020 | 0.017 | 0.016 | 1  |
| Nartheciaceae    | Dioscoreales   | Monocots      | 31   | 108 | 114.2 |     |     | 0.014 | 0.010 |       |       | 2  |
| Nelumbocaceae    | Proteales      | Eudicots      | 1.5  | 125 | 126.1 | 110 | 116 | 0.001 | 0.000 | 0.002 | 0.002 | 3  |
| Nymphaeaceae     | Nymphaeales    | ANITA         | 58   | 111 | 154.3 | 38  | 42  | 0.016 | 0.010 | 0.046 | 0.042 | 10 |
| Pandanaceae      | Pandanales     | Monocots      | 805  | 67  | 67.2  | 47  | 52  | 0.043 | 0.040 | 0.062 | 0.056 | 1  |
| Parnassiaceae    | Celastrales    | Rosids        | 51   | 58  | 42.0  | 71  | 76  | 0.029 | 0.040 | 0.024 | 0.022 | 1  |
| Petrosaviaceae   | Petrosaviales  | Monocots      | 4    | 100 | 120.4 | 109 | 124 | 0.006 | 0.000 | 0.006 | 0.005 | 1  |
| Phrymaceae       | Lamiales       | Asterids      | 234  | 42  | 53.2  |     |     | 0.056 | 0.040 |       |       | 6  |
| Phytolaccaceae   | Caryophyllales | Core eudicots | 65   | 20  | 30.6  | 25  | 26  | 0.091 | 0.060 | 0.073 | 0.070 | 2  |
| Podostemaceae    | Malpighiales   | Rosids        | 270  | 36  | 44.1  | 43  | 42  | 0.068 | 0.060 | 0.057 | 0.058 | 1  |
| Potamogetonaceae | Alismatales    | Monocots      | 102  | 65  | 49.7  |     |     | 0.031 | 0.040 |       |       | 9  |
| Rhizophoraceae   | Malpighiales   | Rosids        | 149  | 54  | 76.4  | 60  | 63  | 0.040 | 0.030 | 0.036 | 0.034 | 4  |
| Roridulaceae     | Ericales       | Asterids      | 2    | 92  | 64.7  | 46  | 50  | 0.003 | 0.000 | 0.007 | 0.006 | 2  |
| Ruppiaaceae      | Alismatales    | Monocots      | 5.5  | 65  | 49.7  |     |     | 0.011 | 0.010 |       |       | 1  |
| Sarraceniaceae   | Ericales       | Asterids      | 15   | 61  | 72.9  | 50  | 54  | 0.019 | 0.020 | 0.024 | 0.022 | 3  |
| Simaroubaceae    | Sapindales     | Rosids        | 95   | 43  | 49.4  | 50  | 50  | 0.046 | 0.040 | 0.040 | 0.040 | 1  |
| Spargianaceae    | Poales         | Commelinids   | 14   | 63  | 66.2  | 85  | 93  | 0.018 | 0.020 | 0.013 | 0.012 | 1  |
| Symplocaceae     | Ericales       | Asterids      | 320  | 63  | 82.2  | 74  | 77  | 0.040 | 0.030 | 0.034 | 0.033 | 3  |

|                |               |             |      |    |       |     |     |       |       |       |       |    |
|----------------|---------------|-------------|------|----|-------|-----|-----|-------|-------|-------|-------|----|
| Thymelaeaceae  | Malvales      | Rosids      | 755  | 29 | 72.4  | 66  | 67  | 0.099 | 0.040 | 0.044 | 0.043 | 6  |
| Tofieldiaceae  | Alismatales   | Monocots    | 27   | 75 | 122.3 | 103 | 118 | 0.019 | 0.010 | 0.014 | 0.012 | 1  |
| Tropaeolaceae  | Brassicales   | Rosids      | 95   | 54 | 55.9  | 34  | 35  | 0.037 | 0.040 | 0.058 | 0.057 | 2  |
| Typhaceae      | Poales        | Commelinids | 10.5 | 63 | 83.6  |     |     | 0.016 | 0.010 |       |       | 4  |
| Ulmaceae       | Rosales       | Rosids      | 35   | 57 | 52.4  | 64  | 66  | 0.027 | 0.030 | 0.024 | 0.023 | 12 |
| Urticaceae     | Rosales       | Rosids      | 2625 | 29 | 25.2  | 54  | 56  | 0.118 | 0.140 | 0.063 | 0.061 | 2  |
| Violaceae      | Malpighiales  | Rosids      | 800  | 56 | 58.7  | 68  | 71  | 0.052 | 0.050 | 0.043 | 0.041 | 8  |
| Zosteraceae    | Alismatales   | Monocots    | 14   | 66 | 50.7  | 68  | 80  | 0.017 | 0.020 | 0.017 | 0.014 | 2  |
| Zygophyllaceae | Zygophyllales | Rosids      | 285  | 64 | 94.2  | 65  | 70  | 0.038 | 0.030 | 0.038 | 0.035 | 3  |

---

## References

- Bell CD, Soltis DE, Soltis PS.** 2010. The age and diversification of the angiosperms re-revisited. *American Journal of Botany*, 97: 1296-1303.
- Davies TJ, Barraclough TG, Chase MW, Soltis PS, Soltis DE, Savolainen V.** 2004. Darwin's abominable mystery: Insights from a supertree of the angiosperms. *Proceedings of the National Academy of Sciences, USA*, 101: 1904-1909.
- Stevens, P.F.** 2010. Angiosperm phylogeny website. March 2011; Version 9:[Available from: <http://www.mobot.org/MOBOT/research/APweb/>].
- Wikström, N., V. Savolainen, and M.W. Chase,** 2001. Evolution of the angiosperms: calibrating the family tree. *Proceedings of the Royal Society of London, Series B*. 268: p. 2211-2220.

APPENDIX S3

Sister groups used for the test of species richness in families bearing self-compatibility (SC) versus families bearing (a) heteromorphic, (b) homomorphic self-incompatibility, or (c) (homomorphic) self-sterility (SS) using the molecular phylogenies of the angiosperms from Soltis *et al.* (2011); monocots from Chase *et al.* (2006), Graham *et al.* (2006) and Givnish *et al.* (2006); Poales from Givnish *et al.* (2010); and Brassicales from Hall *et al.* (2004).

| Order          | Families bearing                 |                                    |
|----------------|----------------------------------|------------------------------------|
|                | SC                               | Heteromorphic                      |
| <b>(a)</b>     |                                  |                                    |
| Zingiberales   | Cannaceae + Costaceae            | Zingiberaceae                      |
| Ericales       | Cyrtillaceae                     | Ericaceae                          |
| Malpighiales   | Malesherbiaceae                  | Turneraceae                        |
| Malpighiales   | Rhizophoraceae                   | Erythroxylaceae                    |
| Malpighiales   | Podostemaceae                    | Hypericaceae                       |
| <b>(b)</b>     |                                  |                                    |
| Proteales      | Nelumbonaceae                    | Proteaceae                         |
| Caryophyllales | Drosophyllaceae                  | Droseraceae                        |
| Caryophyllales | Phytolaccaceae                   | Nyctaginaceae                      |
| Lamiales       | Phrymaceae                       | Lamiaceae                          |
| Malvales       | Thymelaeaceae                    | Malvaceae + Dipterocarpaceae       |
| Fagales        | Casuarinaceae                    | Betulaceae                         |
| Rosales        | Ulmaceae + Moraceae + Urticaceae | Rhamnaceae                         |
| Malpighiales   | Malesherbiaceae                  | Passifloraceae                     |
| <b>(c)</b>     |                                  |                                    |
| Nymphaeales    | Cabombaceae + Nymphaeaceae       | Austrobaileyaceae + Schisandraceae |
| Piperales      | Lactoridaceae                    | Aristolochiaceae                   |
| Laurales       | Calycanthaceae                   | Monimiaceae + Lauraceae            |
| Alismatales    | Zosteraceae + Potamogetonaceae   | Araceae + Juncaginaceae            |
| Petrosaviales  | Petrosaviaceae                   | Araceae                            |
| Pandanales     | Pandanaceae                      | Cyclanthaceae                      |
| Asparagales    | Asparagaceae                     | Laxmanniaceae + Ruscaceae          |
| Zingiberales   | Cannaceae + Costaceae            | Marantaceae                        |
| Poales         | Juncaceae                        | Cyperaceae                         |
| Poales         | Eriocaulaceae + Mayacaceae       | Xyridaceae                         |
| Cornales       | Curtisiaceae                     | Loasaceae                          |
| Ericales       | Balsaminaceae                    | Marcgraviaceae                     |
| Lamiales       | Phrymaceae                       | Paulowniaceae + Orobanchaceae      |

|              |               |              |
|--------------|---------------|--------------|
| Apiales      | Apiaceae      | Araliaceae   |
| Sapindales   | Simaroubaceae | Meliaceae    |
| Fagales      | Juglandaceae  | Myricaceae   |
| Celastrales  | Parnassiaceae | Celastraceae |
| Malpighiales | Caryocaraceae | Ochnaceae    |

---
